1 Snx4-mediated nucleophagy targets transcription factors controlling *ATG* gene expression

2

3 Sara E. Hanley<sup>1</sup>, Stephen D. Willis<sup>1</sup> and Katrina F. Cooper<sup>1,2</sup>

4

5 <sup>1</sup> Department of Molecular Biology, Graduate School of Biomedical Sciences, Rowan University,  
6 Stratford, NJ, 08084, USA

7 <sup>1,2</sup> Corresponding author: [cooperka@rowan.edu](mailto:cooperka@rowan.edu), Tel: (856)-566-2887

8 <sup>1</sup> Sara E. Hanley - [hanleys2@rowan.edu](mailto:hanleys2@rowan.edu)

9 <sup>1</sup> Stephen D. Willis - [willis58@rowan.edu](mailto:willis58@rowan.edu)

10

11 Characters (with spaces): 64,342

12 **Running title:** Snx4-mediated nucleophagy

13 **ABSTRACT**

14 Autophagy is controlled in part by the repression and activation of Autophagy-related (*ATG*) gene  
15 transcription. Here, we demonstrate that the conserved Cdk8 Kinase Module (CKM) of the mediator  
16 complex represses transcription of several *ATG* genes. To relieve this repression following nitrogen  
17 starvation, Med13 is rapidly degraded via a novel selective autophagy mechanism. This pathway  
18 requires the core autophagy machinery but is independent of known nucleophagy systems. It  
19 requires the cytosolic filament nucleoporin Gle1, the sorting nexin Snx4-Atg20 heterodimer, and  
20 the scaffold protein Atg17. This suggests a model where Med13 traverses through the nuclear pore  
21 complex, passing from Gle1 to Snx4. Snx4 then transports Med13 to autophagosomes by binding  
22 to Atg17. This previously unidentified nucleophagy pathway also mediates the autophagic  
23 degradation of two transcriptional activators of *ATG* genes (*Rim15*, *Msn2*) suggesting that this  
24 mechanism targets transcription factors that regulate *ATG* expression. This system provides a new  
25 level of selectivity, permitting the cell to fine-tune the autophagic response by controlling the  
26 turnover of both positive and negative *ATG* transcription factors.

27

28 **Keywords:** Gle1/Med13/Nucleophagy/Selective autophagy/Snx4

## 29 INTRODUCTION

30 Macro-autophagy (hereafter autophagy) is a controlled catabolic process that aids cellular  
31 survival during adverse conditions such as starvation or proteolytic stress, by degrading damaged  
32 or unnecessary proteins in the vacuole (lysosome in higher eukaryotes) (Klionsky & Codogno,  
33 2013). In budding yeast, non-selective pathways are upregulated in response to nitrogen depletion.  
34 This triggers a cascade of events, resulting in non-specific cytosolic cargos being sequestered  
35 within autophagosomes and ultimately degraded by vacuolar proteolysis. Selective autophagy  
36 pathways use receptor proteins to recognize and deliver specific cargos such as organelles, protein  
37 aggregates, and large multi-subunit complexes to autophagosomes (Farre & Subramani, 2016).

38 Nuclear autophagy or nucleophagy is the least well understood of the selective autophagy  
39 mechanisms. Underscoring its importance, various pathologies namely cancer, and  
40 neurodegeneration are linked with perturbed nucleophagy (Fu *et al*, 2018). It is best characterized  
41 in yeast where macro-nucleophagy utilizes a receptor protein and involves the sequestration of a  
42 portion of the nucleus into autophagosomes (Mochida *et al*, 2015 ). In contrast, micro-nucleophagy  
43 (Piecemeal nucleophagy), is autophagosome independent, and forms nuclear-vacuole junctions  
44 which pinch off portions of the nucleus directly into the vacuolar lumen (Roberts *et al*, 2003).  
45 Recently, an autophagic mechanism has been described that removes defective nuclear pore  
46 complexes (NPCs) (Lee *et al*, 2020).

47 In *S. cerevisiae*, 41 unique autophagy-related (*ATG*) genes have been identified that control  
48 this highly coordinated and complex process (Delorme-Axford & Klionsky, 2018). Accordingly,  
49 these genes are tightly regulated at multiple levels. Recently we have shown that the cyclin C-Cdk8  
50 kinase negatively regulates *ATG8* expression within the Ume6-Rpd3 HDAC axis (Willis *et al*, 2020).  
51 This kinase, together with Med13 and Med12 form the Cdk8 kinase module (CKM) of the mediator  
52 complex that in yeast predominantly repress transcription of a diverse set of meiosis and stress  
53 response genes (Cooper *et al*, 1997; Cooper *et al*, 1999) by interacting with DNA bound

54 transcription factors and RNA polymerase II (Akoulitchev *et al*, 2000; Jeronimo *et al*, 2016; Nemet  
55 *et al*, 2014).

56 Activation of genes controlled by the CKM is achieved by disrupting its association with the  
57 mediator (Jeronimo & Robert, 2017). Studies from our group revealed that this is achieved by  
58 CKM disassembly. However, we observed that the mechanisms used to disassemble the CKM is  
59 dependent upon environmental cues (outlined in Fig. 1) (Cooper *et al*, 2014). In short, oxidative  
60 stress triggers cyclin C translocation to the cytoplasm (Cooper *et al*, 2012) where it mediates stress-  
61 induced mitochondrial fission and regulated cell death (RCD) in both yeast (Cooper *et al.*, 2014)  
62 and mammalian cells (Ganesan *et al*, 2019; Jezek *et al*, 2019; Wang *et al*, 2015). Its nuclear release  
63 is dependent upon Med13's destruction by the UPS (Khakhina *et al*, 2014; Stieg *et al*, 2018). In  
64 contrast, following a survival cue (nitrogen starvation), cyclin C is rapidly destroyed by the UPS  
65 before its nuclear release which prevents mitochondrial fission (Willis *et al.*, 2020).

66 This study reveals that Med13 is degraded by vacuolar proteolysis by a previously  
67 undescribed autophagic pathway which requires the cytosolic nucleoporin Gle1 and the sorting  
68 nexin heterodimer Snx4-Atg20. Moreover, two transcriptional activators that regulate *ATG*  
69 expression were also degraded upon nitrogen starvation by this mechanism. Taken together, this  
70 suggests a model in which Snx4-mediated nucleophagy of *ATG* transcriptional regulators allows  
71 fine-tuning of the autophagic response. This highly selective autophagy mechanism rapidly  
72 degrades substrates and requires the nuclear pore complex which makes this pathway distinct from  
73 previously described nucleophagy pathways.

74

## 75 **RESULTS**

### 76 **Med13 is actively degraded following nitrogen starvation.**

77 We started this investigation by addressing if Med13 was destroyed following nitrogen  
78 starvation. Wild-type cells expressing endogenous Med13-9xmyc were starved for nitrogen (SD-  
79 N), and Western blot analysis showed that Med13 protein levels decreased with a half-life of 2.6 h



80 (Fig 1B, D, source data Fig 1). Similarly, Med13 was rapidly degraded in replete medium containing  
81 rapamycin, a drug that mimics nitrogen starvation by inhibiting TORC1 (Li *et al*, 2014) (Fig 1B, Fig  
82 EV1A). As Med13 half-life is >6 h in unstressed cultures (Khakhina *et al.*, 2014) and *MED13* mRNA  
83 increased following 4 h in SD-N (Fig EV1B), these results indicate that Med13 is actively degraded  
84 following TORC1 inhibition.

85

### 86 **Med13 degradation following nitrogen starvation is mediated by the vacuole.**

87 Med13 levels were next monitored in *ump1Δ*, a mutant deficient for 20S proteasome  
88 assembly (Ramos *et al*, 1998), and no change in degradation kinetics was observed (Fig 1C, D).  
89 In contrast, in a vacuolar protease mutant (*pep4Δ prb1Δ.1*) (Takeshige *et al*, 1992; Van Den Hazel  
90 *et al*, 1996) Med13 was stable in SD-N (Fig 1C, D) (half-life >15 h) indicating that Med13  
91 degradation requires vacuolar proteolysis. Confirming this, the same results were obtained in wild  
92 type, *ump1Δ* and *pep4Δ prb1Δ.1* cells harboring a low copy, functional Med13-3xHA plasmid (Stieg  
93 *et al.*, 2018) (Fig EV1C, D). Moreover, we found that after nitrogen starvation GFP accumulated in  
94 Med13-GFP cleavage assays. This indicates that Med13-GFP is degraded in the vacuole as the  
95 compact fold of GFP renders it resistant to vacuolar hydrolases (Shintani & Klionsky, 2004).  
96 Accordingly, repeating these cleavage assays in *pep4Δ prb1Δ.1* cells abolished the formation of  
97 free GFP and stabilized full-length Med13-GFP (Fig 1E). As anticipated from our previous studies  
98 (Khakhina *et al.*, 2014) Med13-GFP was destroyed following 0.8 mM H<sub>2</sub>O<sub>2</sub> and no GFP  
99 accumulation was seen (Fig 1F). These results show that the proteolysis machinery employed to  
100 degrade Med13 is dependent upon environmental cues.

101 To visualize Med13 vacuolar degradation we used live-cell imaging of endogenous Med13-  
102 mNeongreen in *pep4Δ prb1Δ.1* cells. In SD media, Med13-mNeongreen is nuclear (Fig 2A) but  
103 after 4 h in SD-N, Med13 accumulated in the vacuole (Fig 2B). The deconvolved collapsed images  
104 in Fig 2C also captured Med13-mNeongreen transitioning between these organelles. After 24 h in  
105 SD-N, Med13-mNeongreen is exclusively vacuolar (Fig EV2A), and similar results were obtained

106 when endogenous Med13-YFP was expressed in wild-type cells treated with PMSF that blocks the  
107 activity of vacuolar serine proteases (Fig 2B) (Takehige *et al.*, 1992). These results are consistent  
108 with a model in which nitrogen starvation triggers Med13 vacuolar proteolysis.

109

### 110 **Med13 degradation requires core autophagy machinery.**

111 Next, we investigated if Med13 degradation was dependent upon proteins required for  
112 autophagosome biogenesis (see Fig 3A). Med13 was significantly stabilized following nitrogen  
113 starvation in mutants defective in induction (*atg1Δ*) or phagophore fusion (*atg8Δ*) (Kamada *et al.*,  
114 2000) (half-lives >15 h, Fig 3B, C). Likewise, GFP accumulation from Med13-GFP was abolished  
115 in various autophagy mutants (Fig 3A, D). We did observe some turnover of full-length Med13-GFP  
116 which we attribute to a combination of Med13 being expressed from the *ADH1* promoter rather than  
117 the endogenous locus used for degradation assays, and UPS activity. Consistent with this, Med13-  
118 GFP was more stable in *atg1Δ ump1Δ* than *atg1Δ* cells (Fig EV3A). Therefore, both the vacuole  
119 and core autophagy proteins are needed for Med13 degradation.

120

### 121 **Med13 degradation does not use known selective autophagy pathways**

122 Selective autophagy of excess or damaged cellular components in physiological conditions  
123 requires the scaffold protein Atg11 (Zientara-Rytter & Subramani, 2020). In starvation conditions,  
124 Atg17 replaces Atg11 and functions as the scaffold protein tethering the Atg1 kinase complex to  
125 the growing phagophore (Matscheko *et al.*, 2019). Analyzing the autophagic degradation of Med13-  
126 GFP (Fig 3E) or degradation of endogenous Med13-9xmyc (Fig EV3B, C) revealed that Atg17 but  
127 not Atg11 is required for Med13 destruction. Likewise, known receptors for selective autophagy  
128 pathways (Cue5, Atg19, Atg36 and Atg32, Fig EV3D) (Farre & Subramani, 2016) including those  
129 needed for micro- and macro- nucleophagy (Nvj1, Atg39 and Atg40, Fig 4A, Fig EV3B, C) (Millen  
130 *et al.*, 2009; Mochida *et al.*, 2015) are also not required. This is consistent with a model that Med13  
131 is degraded via an undescribed nucleophagy pathway.

132

133 **The cytoplasmic nucleoporin Gle1 associates with Med13 after nitrogen starvation.**

134 To define components of this pathway, pull-down assays using Med13-3xHA followed by  
135 mass-spectroscopy was used (Fig EV4A, B and Table I for a list of candidate interactors). The  
136 conserved, essential nucleoporin Gle1, that localizes to the cytoplasmic filament of the nuclear pore  
137 complex (NPC) was identified. Gle1 is a regulator of DEAD-box proteins that are required to  
138 facilitate changes to ribonucleoprotein complexes involved in mRNA export and translation initiation  
139 (Alcazar-Roman *et al*, 2006; Aryanpur *et al*, 2017; Weirich *et al*, 2006). Co-immunoprecipitation  
140 analysis revealed that Med13-3xHA and endogenous Gle1-GFP interacted following 1 h SD-N,  
141 confirming this interaction (Fig 4B, source data Fig 2). Yeast two-hybrid assays (Y2H) showed that  
142 the large central intrinsic disordered region (IDR) of Med13, which provides a flexible interaction  
143 hub for multiple partners (Stieg *et al.*, 2018; Uversky, 2011), interacts with Gle1 (Fig 4C, Fig EV5A,  
144 B). In addition, endogenous Med13-mNeongreen and Gle1-RedStar were followed by live-cell  
145 imaging. Med13 moves from being diffuse nuclear to associating with the punctate Gle1-RedStar  
146 that surrounds the nucleus on its passage to the vacuole after nitrogen starvation (Fig 4D).

147 Gle1 is an essential protein (Murphy & Wentle, 1996), therefore, the auxin-inducible degron  
148 (AID) system was used to reduce Gle1 protein levels (Fig EV4C). The autophagic degradation of  
149 Med13-GFP was significantly decreased following auxin treatment (Fig 4E) as monitored by GFP  
150 accumulation. Moreover, after nitrogen depletion, Med13-mNeongreen was retained in the nucleus  
151 in the *GLE1*-degron (Fig 4F). However, Crm1 and Msn5, two major Ran-dependent  $\beta$  karyopherins  
152 that export mRNA and nuclear proteins following stress (Hutten & Kehlenbach, 2007;  
153 Mosammaparast & Pemberton, 2004; Yoshida & Blobel, 2001), are not required for Med13  
154 autophagic degradation (Fig EV4D, E). This strongly suggests that Med13 is transported through  
155 the NPC to exit the nucleus, ending at the Gle1 exchange platform.

156

157 **The sorting nexin-heterodimer Snx4-Atg20 is required for efficient autophagic degradation**  
158 **of Med13.**

159 To further define components of this new nucleophagy mechanism, null alleles of candidate  
160 proteins from the mass spectroscopy were screened using Med13-GFP cleavage assays. In cells  
161 deleted for the conserved sorting nexin Snx4 (Atg24), we found that free GFP was significantly  
162 reduced (Fig 5A). Snx4 is a member of the conserved sorting nexin family of proteins. Snx4 forms  
163 distinct heterodimer complexes, with either Snx41 or Atg20, which mediate retrograde trafficking of  
164 cargo from the vacuole and endosomes to the Golgi. This role maintains homeostasis and is  
165 dispensable for non-selective autophagy (Ma & Burd, 2020; Ma *et al*, 2017; Ma *et al*, 2018; Suzuki  
166 & Emr, 2018). In contrast, Snx4-Atg20 is essential for many selective autophagy pathways  
167 including mitophagy and pexophagy (Deng *et al*, 2013; Kanki *et al*, 2009; Nice *et al*, 2002; Popelka  
168 *et al*, 2017; Shpilka *et al*, 2015)

169 Co-immunoprecipitation analysis confirmed the interaction between Med13 and Snx4 in  
170 SD-N (Fig 5B). Med13 degradation assays revealed that Snx4 and Atg20, but not Snx41, mediate  
171 Med13 autophagic degradation (Fig 5C, D). The half-life of Med13 in these mutants was 6.5 and  
172 7.0 h, respectively, compared to >15 h seen in core autophagic mutants. Cytosolic and vacuolar  
173 Med13-mNeogreen levels were drastically reduced in *snx4Δ pep4Δ prb1Δ.1* mutants compared  
174 to the *pep4Δ prb1Δ.1* control (Fig 5E, F, G). These data demonstrate that the Snx4-Atg20  
175 heterodimer is required for maximal Med13 autophagic degradation, but in its absence, limited  
176 autophagic degradation of Med13 still can occur. Taken together these results show that Snx4-  
177 Atg20 heterodimer mediates the efficient autophagic degradation of Med13

178

179 **Snx4 localizes to the nuclear periphery to transport Med13 to autophagosomes.**

180 Snx4 binds to the scaffold protein Atg17 (Nice *et al.*, 2002), whose major autophagic role is  
181 binding the Atg1 kinase to the PAS (Hollenstein & Kraft, 2020). As both Snx4 and Atg17 mediate

182 Med13 degradation, this suggests a model in which once Med13 passes through the NPC, it is  
183 recognized by Snx4 and delivered to the growing phagophore by Snx4-Atg17 association.  
184 Consistent with this, Med13-3xHA and endogenous Atg17-GFP co-immunoprecipitated following 2  
185 h in SD-N. In *snx4Δ*, this interaction was drastically decreased (Fig 6A). Also, endogenous Atg17-  
186 RedStar co-localized with Med13-mNeogreen after nitrogen starvation (Fig EV6A). This suggests  
187 that Snx4-Atg17 interaction promotes the efficient recruitment of Med13 to autophagosomes.  
188 Quantitative co-localization analysis with GFP-Snx4 with the nuclear marker Nab2-mCherry,  
189 showed that nitrogen depletion triggers a ~10-fold increase in perinuclear GFP-Snx4 foci (Fig 6B,  
190 Fig EV6B, C). Moreover, Med13-mNeogreen co-localized with both perinuclear and cytosolic  
191 Snx4 foci in SD-N (Fig 6C and EV6D). Together, this suggests that Snx4 localizes to the nuclear  
192 periphery to retrieve and transport Med13 to autophagosomes via Atg17 association.

193 The above model predicts that Snx4 and Gle1 interact whilst “handing-off” Med13 from the  
194 NPC to the sorting nexin complex. Live-cell imaging showed that perinuclear Snx4 foci are adjacent  
195 to, or co-localize with, Gle1 in unstressed cultures. After nitrogen starvation, an increased number  
196 of perinuclear Snx4 foci co-localize with Gle1 (Fig 6D and Fig EV6E), which is consistent with our  
197 model that Snx4 localizes to the NPC to retrieve Med13.

198

### 199 **Snx4 specifically targets for Med13 autophagic degradation.**

200 To further understand the sequential stages of this selective autophagy pathway, we next  
201 asked if Med13 nuclear localization was required for retrieval and transport by Snx4. To address  
202 this, we fused Med13-GFP to the N-terminus of Crn1, a protein associated with actin rafts, which  
203 relocalized Med13 to the plasma membrane (Humphries *et al*, 2002) (Fig 7A). Autophagic  
204 degradation assays with Crn1-Med13-GFP showed that GFP accumulated in wild-type cells, and  
205 this was mostly dependent on Snx4 (Fig 7B). This confirms that Med13 can be targeted for Snx4-  
206 mediated autophagic destruction even when located outside the nucleus. Autophagic degradation  
207 of Pgc1-GFP, an established substrate of non-selective autophagy (Welter *et al*, 2010), is Snx4

208 independent (Fig EV7A). This provides further evidence that Snx4 binds to Med13 after nuclear  
209 release and this interaction is highly specific.

210 We next addressed whether Gle1 and Snx4 remain part of the Med13 complex delivered to  
211 the vacuole. No substantial accumulation of GFP was seen from GFP-Snx4 (Fig 7C) or Gle1-GFP  
212 (Fig 7D), suggesting that neither protein is incorporated into autophagosomes or degraded by the  
213 vacuole. Importantly, by monitoring the timing of GFP accumulation from Med13-GFP, we observed  
214 that the earliest detection of GFP occurred at 2 h of nitrogen depletion when both Gle1 and Snx4  
215 are present (Fig 7E). These data support the model that Gle1 and Snx4 mediate Med13 delivery to  
216 the autophagosome, but these proteins themselves are not vacuolar substrates.

217

### 218 **Snx4 BAR domains interact with the C-terminal domain of Med13**

219 To further understand the interaction between Gle1, Snx4, and Med13, we used Y2H analysis  
220 to ask if Snx4 and Gle1 associates with the same or different domains of Med13. The results show  
221 that Snx4 interacts with the structured C-terminal tail domain of Med13 (Fig 7F, EV5C). Phyre2 plot  
222 analysis of this region (Kelley *et al*, 2015) revealed two potential domains (Fig 7G), of which only  
223 one, Med13<sup>907-1163</sup> interacted with Snx4 (Fig 7G). Therefore Snx4 interacts with a previously  
224 undescribed region of Med13 that lies adjacent to the Gle1 interaction domain. Moreover, as Snx4  
225 is not a nuclear protein, this interaction may be direct and define a new role for Snx4 in transporting  
226 nuclear proteins.

227 Snx4 is a conserved member of the SNX-BAR subfamily of sorting nexin proteins. Common  
228 to all SNX family members it contains a phosphoinositide-binding phox homology (PX) domain,  
229 which binds to phosphatidylinositol 3-phosphate enriched endosomal membranes. It also contains  
230 two BAR (Bin/Amphiphysin/Rvs) domains that bind to curved membranes upon dimerization  
231 (Popelka *et al.*, 2017; Stanishneva-Konovalova *et al.*, 2016). Y2H interaction analyses between  
232 either Snx4 domains (PX or BAR domains) and Med13<sup>907-1163</sup> indicated that the Med13-Snx4

233 interaction occurs through the BAR domain region (Fig 7H). Taken together, these results indicate  
234 that the BAR domains recognize Snx4 cargo binding as well as dimerization partners.

235

### 236 **Med13 negatively regulates the transcription of a subset of ATG genes.**

237 We next explored if this newly described nucleophagy pathway affects viability during  
238 nitrogen starvation. Consistent with previous studies (Nemec *et al*, 2017), efficient survival in  
239 prolonged nitrogen starvation conditions requires Snx4 (Fig EV7B). Snx4 is dispensable for non-  
240 selective autophagy but required for many forms of non-selective autophagy (Ma *et al.*, 2018). This  
241 suggests that the role of Snx4 in these pathways is essential for cellular adaptation and survival in  
242 prolonged starvation conditions. Survival during periods of nutrient depletion requires the  
243 upregulation of ATG genes. As Med13 destruction following H<sub>2</sub>O<sub>2</sub> relieves repression on SRGs  
244 (Khakhina *et al.*, 2014), here asked if a similar strategy was used for the nitrogen starvation  
245 response. RT-qPCR analysis of ATG mRNA levels in unstressed wild-type and *med13Δ* cells  
246 showed a ~fourfold increase in ATG8 mRNA levels (Fig 8A) that was mirrored by Atg8 protein  
247 levels (Fig EV7C). Furthermore, ATG1 and ATG14 mRNA levels were also elevated (Fig 8A),  
248 indicating Med13 represses transcription of a subset of ATG genes. Moreover, they are consistent  
249 with the model that the destruction of both cyclin C and Med13 following nitrogen starvation are  
250 mechanisms used to relieve this repression. These results indicate that Snx4 mediates a new  
251 specialized autophagy program able to target a transcriptional repressor that provides a positive  
252 feedback loop for the autophagic response.

253

### 254 **Snx4-mediated nucleophagy degrades other transcription factors following nitrogen 255 starvation.**

256 Next, we wanted to explore the idea that Snx4-mediated nucleophagy is a mechanism used  
257 by the cell to fine-tune the autophagic response at the level of transcription. We first examined the  
258 transcriptional activator Rim15 that also regulates ATG genes. During nitrogen starvation, Rim15



259 enters the nucleus to directly phosphorylate and inhibit the activity of the transcriptional repressors  
260 Ume6 (Bartholomew *et al*, 2012) and Rph1 (Bernard *et al*, 2015). Surprisingly, Rim15-GFP  
261 cleavage assays revealed Rim15 degradation by Snx4-dependent vacuolar proteolysis that is  
262 independent of known nucleophagy pathways (Fig 8B).

263 To address if Snx4-mediated nucleophagy may have a more global role in degrading  
264 transcription factors that control *ATG* expression, the transcriptional activators Msn2 and Ccl1  
265 were tested (Bernard *et al.*, 2015; Vlahakis *et al*, 2017; Zhu *et al*, 2016). Free GFP accumulated  
266 only from Msn2-GFP in wild-type cells following nitrogen starvation, illustrating that Msn2 is  
267 degraded via the vacuole, and this degradation requires Snx4 (Fig 8C). These results support the  
268 conclusion that Snx4-mediated degradation of transcription factors targets a unique subset of  
269 nuclear proteins. These findings also provide the first evidence that the autophagic pathway directly  
270 targets regulatory proteins that control its own processes.

271

## 272 **DISCUSSION**

273 Here, by following Med13's fate after nitrogen starvation, we have uncovered a previously  
274 undescribed nucleophagy pathway in which both negative and positive transcriptional regulators  
275 of *ATG* genes are degraded. Our findings, together with previous studies, suggest a two-step  
276 pathway involving the NPC and Snx4 for Med13 translocation from the nucleus to the autophagic  
277 machinery (outlined in Fig 8D). First, Med13 disassociates from the CKM, shuttles through the NPC  
278 and associates with the cytoplasmic nucleoporin Gle1. In the second step, Med13 is handed-off  
279 from Gle1 to the sorting nexin heterodimer Snx4-Atg20. Once assembled, this complex localizes  
280 to the PAS via the non-selective autophagy scaffold Atg17. Lastly, Snx4-Atg20 is recycled back to  
281 the cytosol, and Med13 is degraded by vacuolar proteolysis. This new pathway is distinct from  
282 previously identified mechanisms, being the first described pathway to specifically target  
283 transcription factors for autophagic degradation. This mode of degradation does not require the  
284 canonical nucleophagy mechanisms but instead requires the NPC. Notably, the pathway uses the



285 non-selective scaffold Atg17, and lastly the process is rapid, occurring within 4 h making it distinct  
286 from other forms of selective autophagy which require longer starvation times.

287

288         How does Med13 find its way to the autophagosome? Med13 is a large, 160 kDa protein  
289 that must require an active process to transit from the nucleus to the cytoplasm. Its unusual  
290 structure, two folded domains separated by a ~1000 amino acid IDR region, suggests it functions  
291 as a scaffold and interaction hub. This model is supported by both physical (Nagulapalli *et al*, 2016)  
292 and genetic studies (Stieg *et al.*, 2018). Consistent with this activity, the IDR of Med13 interacts  
293 with Gle1, cyclin C, and Cdk8 (see Fig. 4) and is the target of additional regulatory protein kinases  
294 including Snf1 (Willis *et al*, 2018). The established role of the Gle1-Dbp5 complex in releasing  
295 RNPs (ribonucleoproteins) from mRNPs (messenger ribonucleoprotein particles) (Folkmann *et al*,  
296 2011) sets a precedent for Gle1 handing off proteins once they transit through the NPC. Moreover,  
297 recent structural data places the Gle1-Dbp remodeling complex right over the NPC's central  
298 channel, allowing it to efficiently capture proteins as they reach the cytoplasmic side of the NPC  
299 (Fernandez-Martinez *et al*, 2016). Although speculative, a similar capture and release mechanism  
300 may be used in the Med13 handoff between Gle1 to Snx4. In support of this model, Gle1 and Snx4  
301 co-localize at the NPC (Fig. 6D), but currently, it is unknown if these proteins directly interact.

302

303         The best-characterized cargo of Snx4-Atg20 is Snc1, a plasma membrane-directed v-  
304 SNARE, but it remains unknown how this protein binds to Snx4 (Bean *et al*, 2017; Hettema *et al*,  
305 2003; Ma *et al.*, 2017). Similar to our results with Med13, Snc1 associates with the BAR domain of  
306 Snx4 using both co-immunoprecipitation analysis as well as Y2H assays (Zhang *et al*, 2009). Taken  
307 together, these results suggest that the BAR domain of Snx4 can both recognize cargos as well as  
308 be used for dimerization with Atg20. As the newly defined vital function of autophagy receptor  
309 proteins is to stably connect autophagy cargo with scaffold proteins (Hollenstein *et al*, 2019) our  
310 results place Snx4 as a receptor protein for this novel nucleophagy mechanism. Supporting this,

311 Snx4 co-localizes with Med13 at both perinuclear and cytoplasmic locations. Our finding that  
312 efficient Med13 and Atg17 co-immunoprecipitation requires Snx4 suggests that this sorting nexin  
313 relays Med13 from the NPC to the autophagic machinery. In addition, Snx4 mediates Med13  
314 vacuolar degradation when this nuclear protein is relocalized to the plasma membrane, illustrating  
315 that Snx4 specifically targets and transports Med13 to growing autophagosomes. Defining the Snx4  
316 interaction motif on Med13, as well as Msn2 and Rim15, may result in a common “Snx4 recognition  
317 motif” that could be used to identify additional transcription factors that are degraded by this  
318 mechanism. This would be useful because, despite the recent discovery of additional Snx4 cargos,  
319 (Bean *et al.*, 2017) no consensus Snx4-dependent sorting signal has been identified (Ma & Burd,  
320 2020). This is important as Snx4 is evolutionarily conserved (Zhang *et al.*, 2018), with recent  
321 discoveries that Snx4 dysregulation is now associated with the etiology of many diseases,  
322 including, cancer, Parkinson's disease and Alzheimer's disease (Hu *et al.*, 2015).

323  
324 The most unexpected finding from this research was that the complex process of autophagy  
325 is used to degrade transcription factors. More unexpectedly, was that two transcriptional activators  
326 of *ATG* genes are also regulated by this pathway. This suggests that nucleophagy can fine-tune  
327 transcription and points to a new regulatory role for autophagy beyond its canonical function of  
328 recycling damaged/unnecessary proteins or organelles. The molecular details of how these  
329 transcription factors are initially targeted and then transported through the NPC are unknown.  
330 These details will define the nuclear components required for this pathway. This is important as  
331 nucleophagy is the least well defined of all the autophagy pathways and in recent years links  
332 between deficiencies and human diseases are starting to emerge (Papandreou & Tavernarakis,  
333 2019). Given the highly conserved nature of both Med13 and Snx4 (Tsai *et al.*, 2013; Zhang *et al.*,  
334 2018), these studies are likely to be relevant to mammalian systems.

335

336

## 337 **METHODS**

### 338 **Yeast strains and plasmids**

339 Experiments were primarily performed with endogenously labeled proteins in the *S. cerevisiae*  
340 W303 background (Ronne & Rothstein, 1988) and are listed in Table S2. All strains were  
341 constructed using replacement methodology (Janke *et al*, 2004). Other strains used were from the  
342 Research Genetics yeast knock out collection (Chu & Davis, 2008) and are derived from BY4741  
343 strain background. The Y2H assays were performed in the Y2H Gold strain (PT4084-1, Takara  
344 630489, Matchmaker Gold Yeast Two-Hybrid System). The *GLE1*-Auxin-inducible depletion strain  
345 (Fig 4E, RSY2456) was a gift from K. Cunningham (Snyder *et al*, 2019). Live cells were treated  
346 with 250  $\mu$ M Auxin (Indole-3-acetic acid, Gold Bio I-110) dissolved in ethanol 30 m before nitrogen  
347 starvation. The doxycycline-inducible Crm1 N-end rule degnon strain (Fig EV4D) was generated by  
348 integrating pMK632 (Gnanasundram & Kos, 2015) into the *CRM1* locus in the presence of the  
349 pCM188 TET activator plasmid to create RSY2348 (Ubi-Leu-3HA-*CRM1::NATMX*) as described in  
350 detail in (Willis *et al.*, 2020). In accordance with the Mediator nomenclature unification efforts  
351 (Bourbon *et al*, 2004) members of the Cdk8 module, the cyclin C (*SSN8/UME3/SRB11*), Cdk8  
352 (*SSN3/UME5/SRB10*), *MED12* (*SSN5*) and (*MED13/UME2/SRB9/SSN2*) will use *CNC1*, *CDK8*,  
353 *MED12* and *MED13* gene designations, respectively.

354  
355 Plasmids used in this study are listed in Extended Data Table 3. The wild-type epitope-tagged  
356 plasmids Vph1-mCherry, Nab2-mCherry, Med13-HA and *MED13* Y2H *GAL4* activating domain  
357 plasmids have been previously described (Stieg *et al.*, 2018; Willis *et al.*, 2020). The *GAL4-BD*-  
358 *SNX4* fusion plasmids were constructed by amplifying *SNX4* alleles from wild-type genomic DNA  
359 with oligonucleotides containing *SalI* flanking sites and cloning into the *SalI* site of the *GAL4* binding  
360 domain plasmid pAS2 (Wang & Solomon, 2012). The Crn1-GFP-Med13 plasmid was created by  
361 amplifying the first 400 amino acids of Crn1 from genomic DNA and cloning it in-frame to the N

362 terminus of GFP-Med13 (pSW218). Plasmid construction details are available upon request. All  
363 constructs were verified by sequencing.

364

### 365 **Cell growth**

366 Yeast cells were grown in either rich, non-selective medium (YPDA: 2% (w/v) glucose, 2% (w/v)  
367 Bacto peptone, 1% (w/v) yeast extract, 0.001% (w/v) adenine sulfate) or synthetic minimal dextrose  
368 medium (SD: 0.17% (w/v) yeast nitrogen base without amino acids and ammonium sulfate, 0.5%  
369 (w/v) ammonium sulfate, 1 x supplement mixture of amino acids, 2% (w/v) glucose) allowing  
370 plasmids selection as previously described (Cooper *et al.*, 1997). For nitrogen starvation  
371 experiments, cells were grown as described (Journo *et al.*, 2009).

372

### 373 **Cellular assays**

374 RT-PCR analysis was executed as previously described in (Cooper *et al.*, 2012; Willis *et al.*, 2020).  
375 Oligonucleotides used during these studies are available upon request. All studies were conducted  
376 with three biological samples in technical triplicates. The standard deviation from three replicate  
377 reactions is indicated in the figures. P values were determined using the unpaired Students t-test.  
378 The six-day nitrogen starvation viability assays were executed exactly as described (Willis *et al.*,  
379 2020) with 30,000 cells counted per timepoint using FACS and the studies were conducted in  
380 biological duplicates. Data are mean  $\pm$  standard deviation

381

### 382 **Western blot assays**

383 Protein extracts for Western blot studies were prepared using a NaOH lysis procedure exactly as  
384 described in ((Willis *et al.*, 2018). In short, protein extracts were prepared from 25 ml per timepoint  
385 with the exception of Med13-9xmyc cultures in which 50 ml was needed to visualize the protein.  
386 Proteins were separated on 6-10% SDS polyacrylamide gels depending upon their size using the  
387 Bio-RAD Mini-Trans Blot cell. To detect proteins, 1:5000 dilutions of anti-myc (UpState New York),

388 anti-HA (Abcam) or anti-Pgk1 (Invitrogen) antibodies were used. Western blot signals were  
389 detected using 1:5000 dilutions of either goat anti-mouse or goat anti-rabbit secondary antibodies  
390 conjugated to alkaline phosphatase (Abcam) and CDP-Star chemiluminescence kit (Invitrogen,  
391 cat.#T2307). Signals were quantified relative to Pgk1 or Tubulin (Fig EV1C) controls using CCD  
392 camera imaging (Kodak Inc.) All degradation assays were performed in triplicate. Standard  
393 deviation and significance were calculated from the mean  $\pm$  standard deviation using GraphPad  
394 Prism 7.

395

### 396 **Cleavage assays**

397 Strains harboring GFP-fusion proteins were grown to mid-log in SD, washed and resuspended in  
398 SD-N. Protein extracts were prepared using NaOH as described above (25 mLs /TP). Proteins  
399 were separated using Invitrogen Blot™ 4-12% Bis-Tris Plus gradient gels with 1X MOPS SDS  
400 running buffer (cat.#NW04122BOX). Proteins were transferred to PVDF membranes in 1X Blot™  
401 transfer buffer for 1h 30mins (cat.#BT00061). GFP tagged proteins were detected using 1:5000  
402 dilution of Anti-GFP (WAKO) antibodies and goat anti-mouse secondary antibodies conjugated to  
403 alkaline phosphatase.

404

### 405 **Co-Immunoprecipitation**

406 For co-immunoprecipitation experiments, 1 L of cells were grown to mid-log, washed and  
407 resuspended in SD-N media (250 mLs/TP). Protein extracts were prepared using a glass bead lysis  
408 method exactly as described in (Stieg *et al.*, 2018), except Protein A beads were pre-washed with  
409 IP wash solution (500mM NaCl, 25mM Tris). 1 mg of total protein was immunoprecipitated per  
410 timepoint. Anti-GFP antibodies (Invitrogen) or Anti-HA antibodies (Abcam) were used for  
411 immunoprecipitations. Co-immunoprecipitation blot was probed with antibodies against HA  
412 (Abcam) or T7 (Novagen) epitope. Due to the drastic difference in size between Med13-3xHA and  
413 GFP tagged proteins (Snx4 and Atg17) input controls were run on separate gels. For Atg17

414 experiments endogenous Atg17-GFP was immunoprecipitated from whole lysates to obtain input  
415 controls. For all other input controls 50  $\mu$ g of protein was resuspended in 2 x SDS-PAGE and  
416 separated on either 6% (Med13-3HA) or 10% (GFP-Snx4 and Atg17-GFP) SDS polyacrylamide  
417 gels. All co-immunoprecipitation experiments were performed in *pep4 $\Delta$  prb1 $\Delta$ .1* strains.  
418 (Stieg *et al.*, 2018; Willis *et al.*, 2018).

419

## 420 **Fluorescence Microscopy**

421 For all microscopy experiments, cells were grown to mid-log phase, washed and resuspended in  
422 SD-N for the time points indicated. Deconvolved images were obtained using a Nikon microscope  
423 (Model E800) with a 100x objective with 1.2x camera magnification (Plan Fluor Oil, NA 1.3) and a  
424 CCD camera (Hamamatsu Model C4742). Data were collected using NIS software and processed  
425 using Image Pro software. All images of individual cells were optically sectioned (0.2  $\mu$ M slices at  
426 0.3  $\mu$ M spacing) and deconvolved, and slices were collapsed to visualize the entire fluorescent  
427 signal within the cell. The nuclei were visualized in live cells using Hoechst staining (Cayman  
428 Chemical 15547). Hoechst (5  $\mu$ M), dissolved in water, was added to cells growing in either SD or  
429 SD-N (5  $\mu$ M) 30 min before they were visualized by microscopy. The vacuole was visualized in live  
430 cells in (Fig EV2A) using FM4-64 (Invitrogen, T3166) and phenylmethane-sulfonyl-fluoride (PMSF,  
431 Sigma P7626) treatment of cells was executed exactly as described (Journo *et al.*, 2008). In order  
432 to optimize the visualization of the lowly expressed endogenous Med13-mNeogreen the Keyence  
433 microscope was used. This scope has a high sensitivity CCD and high-speed autofocus, low  
434 photobleaching mode that aids in monitoring Med13 localization in live cells. Deconvolution and  
435 processing capabilities are very limited with the compatible analyzer software. Single plane images  
436 were obtained using a Keyence BZ-X710 fluorescence microscope with a 100x objective with 1.0x  
437 camera magnification (PlanApo $\lambda$  Oil, NA 1.45) and a CCD camera. Data were collected using BZ-  
438 X Analyzer software. Quantification of Med13-mNeogreen fluorescence within the vacuole was  
439 obtained using the Hybrid cell count function within the analyzer software (300 cells were counted

440 per sample). For analysis single extraction settings were used. Red (vacuole, Vph1-mCherry) was  
441 set as the target area and green (Med13-mNeongreen) was set as the extraction area. The  
442 percentage of cells with vacuolar Med13-mNeongreen was calculated using Area ratio (1<sup>st</sup>) (ratio  
443 of the total area of the extracted areas to the target area) and cell count values. Percentages  
444 represent a ratio of extraction area to the target area.

445

#### 446 **Statistics**

447 All representative results included at least two independent biological experiments. P values were  
448 generated from Prism-GraphPad using unpaired Student's t-tests; NS  $P \geq 0.05$ ; \* $P \leq 0.05$ , \*\* $P \leq$   
449  $0.005$ ; \*\*\* $P \leq 0.001$ ; \*\*\*\* $P \leq 0.0001$ . All error bars indicate mean  $\pm$  SD. For quantification of Med13-  
450 9myc degradation kinetics band intensities of each time point was first divided by unstressed, T=0  
451 band intensity. These values were then divided by Pgk1 loading band intensity values which were  
452 also normalized to their T=0 intensities. P-values shown are relative to wild-type T=4 timepoints.

453

#### 454 **ACKNOWLEDGMENTS**

455 We thank C. De Virgilio, P. Herman and K. Cunningham for strains and plasmids. We especially  
456 thank the members of the R. Strich laboratory and the Cooper laboratory for critical reading of this  
457 manuscript.

458

#### 459 **FUNDING**

460 This work was supported by a grant from the National Institutes of Health awarded to K.F.C.  
461 (GM113196).

462

#### 463 **COMPETING INTERESTS**

464 The authors declare no competing or financial interests.

465



466 **AUTHOR CONTRIBUTIONS**

467 SEH, SDW and KFC conceived the study and designed experiments. SEH and SDW performed  
468 experiments. KFC performed most of the microscopy experiments executed with the Nikon  
469 microscope. SEH and KFC wrote the manuscript.

470

471 **REFERENCES**

472 Abeliovich H, Zhang C, Dunn WA, Jr., Shokat KM, Klionsky DJ (2003) Chemical genetic analysis  
473 of Apg1 reveals a non-kinase role in the induction of autophagy. *Mol Biol Cell* 14: 477-490

474 Akoulitchev S, Chuikov S, Reinberg D (2000) TFIID is negatively regulated by cdk8-containing  
475 mediator complexes. *Nature* 407: 102-106.

476 Alcazar-Roman AR, Tran EJ, Guo S, Wente SR (2006) Inositol hexakisphosphate and Gle1  
477 activate the DEAD-box protein Dbp5 for nuclear mRNA export. *Nat Cell Biol* 8: 711-716

478 Aryanpur PP, Regan CA, Collins JM, Mittelmeier TM, Renner DM, Vergara AM, Brown NP,  
479 Bolger TA (2017) Gle1 Regulates RNA Binding of the DEAD-Box Helicase Ded1 in Its Complex  
480 Role in Translation Initiation. *Mol Cell Biol* 37

481 Bartholomew CR, Suzuki T, Du Z, Backues SK, Jin M, Lynch-Day MA, Umekawa M, Kamath A,  
482 Zhao M, Xie Z *et al* (2012) Ume6 transcription factor is part of a signaling cascade that regulates  
483 autophagy. *Proc Natl Acad Sci U S A* 109: 11206-11210

484 Bean BD, Davey M, Conibear E (2017) Cargo selectivity of yeast sorting nexins. *Traffic* 18: 110-  
485 122

486 Bernard A, Jin M, Gonzalez-Rodriguez P, Fullgrabe J, Delorme-Axford E, Backues SK, Joseph B,  
487 Klionsky DJ (2015) Rph1/KDM4 mediates nutrient-limitation signaling that leads to the  
488 transcriptional induction of autophagy. *Curr Biol* 25: 546-555

489 Bourbon HM, Aguilera A, Ansari AZ, Asturias FJ, Berk AJ, Bjorklund S, Blackwell TK, Borggrefe  
490 T, Carey M, Carlson M *et al* (2004) A Unified Nomenclature for Protein Subunits of Mediator

491 Complexes Linking Transcriptional Regulators to RNA Polymerase II. *Mol Cell* 14: 553-557



- 492 Chu AM, Davis RW (2008) High-throughput creation of a whole-genome collection of yeast  
493 knockout strains. *Methods Mol Biol* 416: 205-220
- 494 Cooper KF, Khakhina S, Kim SK, Strich R (2014) Stress-induced nuclear-to-cytoplasmic  
495 translocation of cyclin C promotes mitochondrial fission in yeast. *Dev Cell* 28: 161-173
- 496 Cooper KF, Mallory MJ, Smith JB, Strich R (1997) Stress and developmental regulation of the  
497 yeast C-type cyclin Ume3p (Srb11p/Ssn8p). *EMBO J* 16: 4665-4675
- 498 Cooper KF, Mallory MJ, Strich R (1999) Oxidative stress-induced destruction of the yeast C-type  
499 cyclin Ume3p requires phosphatidylinositol-specific phospholipase C and the 26S proteasome.  
500 *Mol Cell Biol* 19: 3338-3348
- 501 Cooper KF, Scarnati MS, Krasley E, Mallory MJ, Jin C, Law MJ, Strich R (2012) Oxidative-stress-  
502 induced nuclear to cytoplasmic relocalization is required for Not4-dependent cyclin C destruction.  
503 *J Cell Sci* 125: 1015-1026
- 504 Delorme-Axford E, Klionsky DJ (2018) Transcriptional and post-transcriptional regulation of  
505 autophagy in the yeast *Saccharomyces cerevisiae*. *J Biol Chem*
- 506 Deng Y, Qu Z, Naqvi NI (2013) The role of snx41-based pexophagy in magnaporthe  
507 development. *PLoS One* 8: e79128
- 508 Farre JC, Subramani S (2016) Mechanistic insights into selective autophagy pathways: lessons  
509 from yeast. *Nat Rev Mol Cell Biol* 17: 537-552
- 510 Fernandez-Martinez J, Kim SJ, Shi Y, Upla P, Pellarin R, Gagnon M, Chemmama IE, Wang J,  
511 Nudelman I, Zhang W *et al* (2016) Structure and Function of the Nuclear Pore Complex  
512 Cytoplasmic mRNA Export Platform. *Cell* 167: 1215-1228 e1225
- 513 Folkmann AW, Noble KN, Cole CN, Wentz SR (2011) Dbp5, Gle1-IP6 and Nup159: a working  
514 model for mRNP export. *Nucleus* 2: 540-548
- 515 Fu N, Yang X, Chen L (2018) Nucleophagy Plays a Major Role in Human Diseases. *Curr Drug*  
516 *Targets* 19: 1767-1773

- 517 Ganesan V, Willis SD, Chang KT, Beluch S, Cooper KF, Strich R (2019) Cyclin C directly  
518 stimulates Drp1 GTP affinity to mediate stress-induced mitochondrial hyperfission. *Mol Biol Cell*  
519 30: 302-311
- 520 Gari E, Piedrafita L, Aldea M, Herrero E (1997) A set of vectors with a tetracycline-regulatable  
521 promoter system for modulated gene expression in *Saccharomyces cerevisiae*. *Yeast* 13: 837-  
522 848
- 523 Gnanasundram SV, Kos M (2015) Fast protein-depletion system utilizing tetracycline repressible  
524 promoter and N-end rule in yeast. *Mol Biol Cell* 26: 762-768
- 525 Hettema EH, Lewis MJ, Black MW, Pelham HR (2003) Retromer and the sorting nexins  
526 Snx4/41/42 mediate distinct retrieval pathways from yeast endosomes. *EMBO J* 22: 548-557
- 527 Hollenstein DM, Gomez-Sanchez R, Ciftci A, Kriegenburg F, Mari M, Torggler R, Licheva M,  
528 Reggiori F, Kraft C (2019) Vac8 spatially confines autophagosome formation at the vacuole in *S.*  
529 *cerevisiae*. *J Cell Sci* 132
- 530 Hollenstein DM, Kraft C (2020) Autophagosomes are formed at a distinct cellular structure. *Curr*  
531 *Opin Cell Biol* 65: 50-57
- 532 Hu YB, Dammer EB, Ren RJ, Wang G (2015) The endosomal-lysosomal system: from  
533 acidification and cargo sorting to neurodegeneration. *Transl Neurodegener* 4: 18
- 534 Humphries CL, Balcer HI, D'Agostino JL, Winsor B, Drubin DG, Barnes G, Andrews BJ, Goode  
535 BL (2002) Direct regulation of Arp2/3 complex activity and function by the actin binding protein  
536 coronin. *J Cell Biol* 159: 993-1004
- 537 Hutten S, Kehlenbach RH (2007) CRM1-mediated nuclear export: to the pore and beyond.  
538 *Trends Cell Biol* 17: 193-201
- 539 Janke C, Magiera MM, Rathfelder N, Taxis C, Reber S, Maekawa H, Moreno-Borchart A,  
540 Doenges G, Schwob E, Schiebel E *et al* (2004) A versatile toolbox for PCR-based tagging of  
541 yeast genes: new fluorescent proteins, more markers and promoter substitution cassettes. *Yeast*  
542 21: 947-962

- 543 Jeronimo C, Langelier MF, Bataille AR, Pascal JM, Pugh BF, Robert F (2016) Tail and Kinase  
544 Modules Differently Regulate Core Mediator Recruitment and Function In Vivo. *Mol Cell* 64: 455-  
545 466
- 546 Jeronimo C, Robert F (2017) The Mediator Complex: At the Nexus of RNA Polymerase II  
547 Transcription. *Trends Cell Biol* 27: 765-783
- 548 Jezek J, Chang KT, Joshi AM, Strich R (2019) Mitochondrial translocation of cyclin C stimulates  
549 intrinsic apoptosis through Bax recruitment. *EMBO Rep* 20: e47425
- 550 Journo D, Mor A, Abeliovich H (2009) Aup1-mediated regulation of Rtg3 during mitophagy. *J Biol*  
551 *Chem* 284: 35885-35895
- 552 Journo D, Winter G, Abeliovich H (2008) Monitoring autophagy in yeast using FM 4-64  
553 fluorescence. *Methods Enzymol* 451: 79-88
- 554 Kamada Y, Funakoshi T, Shintani T, Nagano K, Ohsumi M, Ohsumi Y (2000) Tor-mediated  
555 induction of autophagy via an Apg1 protein kinase complex. *J Cell Biol* 150: 1507-1513
- 556 Kanki T, Wang K, Baba M, Bartholomew CR, Lynch-Day MA, Du Z, Geng J, Mao K, Yang Z, Yen  
557 WL *et al* (2009) A genomic screen for yeast mutants defective in selective mitochondria  
558 autophagy. *Mol Biol Cell* 20: 4730-4738
- 559 Kelley LA, Mezulis S, Yates CM, Wass MN, Sternberg MJ (2015) The Phyre2 web portal for  
560 protein modeling, prediction and analysis. *Nat Protoc* 10: 845-858
- 561 Khakhina S, Cooper KF, Strich R (2014) Med13p prevents mitochondrial fission and programmed  
562 cell death in yeast through nuclear retention of cyclin C. *Mol Biol Cell* 25: 2807-2816
- 563 Klionsky DJ, Codogno P (2013) The mechanism and physiological function of macroautophagy. *J*  
564 *Innate Immun* 5: 427-433
- 565 Lee CW, Wilfling F, Ronchi P, Allegretti M, Mosalaganti S, Jentsch S, Beck M, Pfander B (2020)  
566 Selective autophagy degrades nuclear pore complexes. *Nat Cell Biol* 22: 159-166
- 567 Li J, Kim SG, Blenis J (2014) Rapamycin: one drug, many effects. *Cell Metab* 19: 373-379

- 568 Ma M, Burd CG (2020) Retrograde trafficking and plasma membrane recycling pathways of the  
569 budding yeast *Saccharomyces cerevisiae*. *Traffic* 21: 45-59
- 570 Ma M, Burd CG, Chi RJ (2017) Distinct complexes of yeast Snx4 family SNX-BARs mediate  
571 retrograde trafficking of Snc1 and Atg27. *Traffic* 18: 134-144
- 572 Ma M, Kumar S, Purushothaman L, Babst M, Ungermann C, Chi RJ, Burd CG (2018) Lipid  
573 trafficking by yeast Snx4 family SNX-BAR proteins promotes autophagy and vacuole membrane  
574 fusion. *Mol Biol Cell* 29: 2190-2200
- 575 Matscheko N, Mayrhofer P, Rao Y, Beier V, Wollert T (2019) Atg11 tethers Atg9 vesicles to  
576 initiate selective autophagy. *PLoS Biol* 17: e3000377
- 577 Millen JI, Krick R, Prick T, Thumm M, Goldfarb DS (2009) Measuring piecemeal microautophagy  
578 of the nucleus in *Saccharomyces cerevisiae*. *Autophagy* 5: 75-81
- 579 Mochida K, Oikawa Y, Kimura Y, Kirisako H, Hirano H, Ohsumi Y, Nakatogawa H (2015)  
580 Receptor-mediated selective autophagy degrades the endoplasmic reticulum and the nucleus.  
581 *Nature* 522: 359-362
- 582 Mosammaparast N, Pemberton LF (2004) Karyopherins: from nuclear-transport mediators to  
583 nuclear-function regulators. *Trends Cell Biol* 14: 547-556
- 584 Murphy R, Wente SR (1996) An RNA-export mediator with an essential nuclear export signal.  
585 *Nature* 383: 357-360
- 586 Nagulapalli M, Maji S, Dwivedi N, Dahiya P, Thakur JK (2016) Evolution of disorder in Mediator  
587 complex and its functional relevance. *Nucleic Acids Res* 44: 1591-1612
- 588 Nemecek AA, Howell LA, Peterson AK, Murray MA, Tomko RJ, Jr. (2017) Autophagic clearance of  
589 proteasomes in yeast requires the conserved sorting nexin Snx4. *J Biol Chem* 292: 21466-21480
- 590 Nemet J, Jelacic B, Rubelj I, Sopta M (2014) The two faces of Cdk8, a positive/negative regulator  
591 of transcription. *Biochimie* 97: 22-27
- 592 Nice DC, Sato TK, Stromhaug PE, Emr SD, Klionsky DJ (2002) Cooperative binding of the  
593 cytoplasm to vacuole targeting pathway proteins, Cvt13 and Cvt20, to phosphatidylinositol 3-

594 phosphate at the pre-autophagosomal structure is required for selective autophagy. *J Biol Chem*  
595 277: 30198-30207

596 Papandreou ME, Tavernarakis N (2019) Nucleophagy: from homeostasis to disease. *Cell Death*  
597 *Differ* 26: 630-639

598 Popelka H, Damasio A, Hinshaw JE, Klionsky DJ, Ragusa MJ (2017) Structure and function of  
599 yeast Atg20, a sorting nexin that facilitates autophagy induction. *Proc Natl Acad Sci U S A* 114:  
600 E10112-E10121

601 Ramos PC, Hockendorff J, Johnson ES, Varshavsky A, Dohmen RJ (1998) Ump1p is required for  
602 proper maturation of the 20S proteasome and becomes its substrate upon completion of the  
603 assembly. *Cell* 92: 489-499

604 Roberts P, Moshitch-Moshkovitz S, Kvam E, O'Toole E, Winey M, Goldfarb DS (2003) Piecemeal  
605 microautophagy of nucleus in *Saccharomyces cerevisiae*. *Mol Biol Cell* 14: 129-141

606 Ronne H, Rothstein R (1988) Mitotic sectored colonies: evidence of heteroduplex DNA formation  
607 during direct repeat recombination. *Proc Natl Acad Sci U S A* 85: 2696-2700

608 Shintani T, Klionsky DJ (2004) Cargo proteins facilitate the formation of transport vesicles in the  
609 cytoplasm to vacuole targeting pathway. *J Biol Chem* 279: 29889-29894

610 Shpilka T, Welter E, Borovsky N, Amar N, Shimron F, Peleg Y, Elazar Z (2015) Fatty acid  
611 synthase is preferentially degraded by autophagy upon nitrogen starvation in yeast. *Proc Natl*  
612 *Acad Sci U S A* 112: 1434-1439

613 Snyder NA, Kim A, Kester L, Gale AN, Studer C, Hoepfner D, Roggo S, Helliwell SB,  
614 Cunningham KW (2019) Auxin-Inducible Depletion of the Essentialome Suggests Inhibition of  
615 TORC1 by Auxins and Inhibition of Vrg4 by SDZ 90-215, a Natural Antifungal Cyclopeptide. *G3*  
616 *(Bethesda)* 9: 829-840

617 Stanishneva-Konovalova TB, Derkacheva NI, Polevova SV, Sokolova OS (2016) The Role of  
618 BAR Domain Proteins in the Regulation of Membrane Dynamics. *Acta Naturae* 8: 60-69

- 619 Stieg DC, Willis SD, Ganesan V, Ong KL, Scurzo J, Song M, Grose J, Strich R, Cooper KF  
620 (2018) A complex molecular switch directs stress-induced cyclin C nuclear release through  
621 SCF(Grr1)-mediated degradation of Med13. *Mol Biol Cell* 29: 363-375
- 622 Strich R, Slater MR, Esposito RE (1989) Identification of negative regulatory genes that govern  
623 the expression of early meiotic genes in yeast. *Proc Natl Acad Sci USA* 86: 10018-10022
- 624 Suzuki SW, Emr SD (2018) Membrane protein recycling from the vacuole/lysosome membrane. *J*  
625 *Cell Biol* 217: 1623-1632
- 626 Takeshige K, Baba M, Tsuboi S, Noda T, Ohsumi Y (1992) Autophagy in yeast demonstrated  
627 with proteinase-deficient mutants and conditions for its induction. *J Cell Biol* 119: 301-311
- 628 Tsai KL, Sato S, Tomomori-Sato C, Conaway RC, Conaway JW, Asturias FJ (2013) A conserved  
629 Mediator-CDK8 kinase module association regulates Mediator-RNA polymerase II interaction. *Nat*  
630 *Struct Mol Biol* 20: 611-619
- 631 Uversky VN (2011) Multitude of binding modes attainable by intrinsically disordered proteins: a  
632 portrait gallery of disorder-based complexes. *Chem Soc Rev* 40: 1623-1634
- 633 Van Den Hazel HB, Kielland-Brandt MC, Winther JR (1996) Review: biosynthesis and function of  
634 yeast vacuolar proteases. *Yeast* 12: 1-16
- 635 Vlahakis A, Lopez Muniozguren N, Powers T (2017) Stress-response transcription factors Msn2  
636 and Msn4 couple TORC2-Ypk1 signaling and mitochondrial respiration to ATG8 gene expression  
637 and autophagy. *Autophagy* 13: 1804-1812
- 638 Wang K, Yan R, Cooper KF, Strich R (2015) Cyclin C mediates stress-induced mitochondrial  
639 fission and apoptosis. *Mol Biol Cell* 26: 1030-1043
- 640 Wang R, Solomon MJ (2012) Identification of She3 as an SCF(Grr1) substrate in budding yeast.  
641 *PLoS One* 7: e48020
- 642 Wanke V, Pedruzzi I, Cameroni E, Dubouloz F, De Virgilio C (2005) Regulation of G0 entry by the  
643 Pho80-Pho85 cyclin-CDK complex. *EMBO J* 24: 4271-4278

644 Weirich CS, Erzberger JP, Flick JS, Berger JM, Thorner J, Weis K (2006) Activation of the  
645 DExD/H-box protein Dbp5 by the nuclear-pore protein Gle1 and its coactivator InsP6 is required  
646 for mRNA export. *Nat Cell Biol* 8: 668-676

647 Welter E, Thumm M, Krick R (2010) Quantification of nonselective bulk autophagy in *S.*  
648 *cerevisiae* using Pgc1-GFP. *Autophagy* 6: 794-797

649 Willis SD, Hanley SE, Beishke T, Tati PD, Cooper KF (2020) Ubiquitin-proteasome-mediated  
650 cyclin C degradation promotes cell survival following nitrogen starvation. *Mol Biol Cell* 31: 1015-  
651 1031

652 Willis SD, Stieg DC, Ong KL, Shah R, Strich AK, Grose JH, Cooper KF (2018) Snf1 cooperates  
653 with the CWI MAPK pathway to mediate the degradation of Med13 following oxidative stress.  
654 *Microbial Cell* 5: 357-370

655 Yoshida K, Blobel G (2001) The karyopherin Kap142p/Msn5p mediates nuclear import and  
656 nuclear export of different cargo proteins. *J Cell Biol* 152: 729-740

657 Zhang H, Chen J, Wang Y, Peng L, Dong X, Lu Y, Keating AE, Jiang T (2009) A computationally  
658 guided protein-interaction screen uncovers coiled-coil interactions involved in vesicular trafficking.  
659 *J Mol Biol* 392: 228-241

660 Zhang H, Huang T, Hong Y, Yang W, Zhang X, Luo H, Xu H, Wang X (2018) The Retromer  
661 Complex and Sorting Nexins in Neurodegenerative Diseases. *Front Aging Neurosci* 10: 79

662 Zhu J, Deng S, Lu P, Bu W, Li T, Yu L, Xie Z (2016) The Ccl1-Kin28 kinase complex regulates  
663 autophagy under nitrogen starvation. *J Cell Sci* 129: 135-144

664 Zientara-Rytter K, Subramani S (2020) Mechanistic Insights into the Role of Atg11 in Selective  
665 Autophagy. *J Mol Biol* 432: 104-122

666 Zubenko GS, Park FJ, Jones EW (1983) Mutations in PEP4 locus of *Saccharomyces cerevisiae*  
667 block final step in maturation of two vacuolar hydrolases. *Proc Natl Acad Sci U S A* 80: 510-514  
668  
669



670 **FIGURE LEGENDS**

671

672 **Figure 1. Med13 is degraded via the vacuolar proteolysis following nitrogen starvation.**

673 **A** Model outlining how the cyclin dependent kinase module (CKM) of the mediator complex is  
674 disassembled following stresses that mediate cell death or survival pathways. Before stress cyclin  
675 C (CC), Cdk8 (8), Med13 (13) and Med12 (12) form the CKM that predominantly represses stress  
676 response genes (SRGs) (Cooper *et al.*, 1997; Cooper *et al.*, 1999). Repression is relieved after  
677 oxidative stress and nitrogen depletion by CKM disassembly, mediated by different mechanisms.  
678 After oxidative stress, Med13 is destroyed by the UPS (Khakhina *et al.*, 2014; Stieg *et al.*, 2018),  
679 which allows cyclin C localization to the mitochondria where it triggers stress-induced mitochondrial  
680 fission and promotes cell death (Cooper *et al.*, 2014). Following nitrogen starvation, cyclin C is  
681 rapidly destroyed by the UPS before its nuclear release to prevent mitochondrial fission (Willis *et*  
682 *al.*, 2020) whereas the fate of Med13 is the subject of this current manuscript. N-nucleus, C-  
683 cytoplasm.

684 **B** Western blot analysis of extracts prepared from wild-type cells expressing endogenous Med13-  
685 9xMyc (RSY2211) resuspended in nitrogen starvation medium (SD-N) or treated with 200 ng/ml  
686 rapamycin for the indicated times.

687 **C** As in B except that endogenous Med13 protein levels (13Myc) were monitored in *ump1Δ*  
688 (RSY1961) and *pep4Δ prb1Δ.1* (RSY2215) strains.

689 **D** Degradation kinetics and half-life of Med13 protein levels obtained in B and C. Error bars indicate  
690 S.D., N=3 of biologically independent experiments.

691 **E** Wild-type (RSY10) or *pep4Δ prb1Δ.1* (RSY449) cells expressing Med13-GFP (pSW218) were  
692 starved for nitrogen for indicated times. For all cleavage assays, free GFP refers to the protease  
693 resistant GFP moiety that accumulates after the full-length fusion protein is degraded via the  
694 vacuole. GFP accumulation was monitored by Western blot analysis using anti-GFP antibodies. An  
695 asterisk indicates a nonspecific proteolytic fragment unrelated to autophagy.



696 **F** As in E except that wild-type cells were resuspended in SD-N or treated with 0.8 mM H<sub>2</sub>O<sub>2</sub>. Pgk1  
697 protein levels were used as a loading control.

698  
699 **Figure 2. Med13 translocates from the nucleus to the vacuole in nitrogen starvation.**

700 **A** Endogenous Med13-mNeongreen localization was monitored in *pep4Δ prb1Δ.1* cells (RSY2305)  
701 expressing Nab2-mCherry (a nuclear marker) before (growing in SD) and after 4 h in SD-N.  
702 Representative single plane images are shown.

703 **B** As in A, except that cells expressed a vacuolar marker (Vph1-mCherry).

704 **C** As in B, except that the slices were taken through the whole cell which were then collapsed and  
705 deconvolved. Representative deconvolved images are shown. Scale bar = 5 μm.

706  
707 **Figure 3. Med13 requires the core autophagy machinery for vacuolar degradation.**

708 **A** Schematic depicting the five stages of autophagy and the major Atg protein complexes  
709 associated with each stage.

710 **B** Western blot analysis of extracts prepared from wild-type (RSY2211), *atg1Δ* (RSY2214) and  
711 *atg8Δ* (RSY2231) cells expressing endogenous Med13-9Myc resuspended in SD-N media for the  
712 indicated times.

713 **C** Degradation kinetics and half-life of Med13 protein levels obtained in B. Error bars indicate S.D.,  
714 N=3 of biologically independent experiments.

715 **D and E** The indicated mutants expressing Med13-GFP (pSW218) were starved for nitrogen for  
716 the indicated times and accumulation of free GFP monitored by Western blot analysis using anti-  
717 GFP antibodies. An asterisk indicates a nonspecific proteolytic fragment unrelated to autophagy.  
718 For all experiments, Pgk1 protein levels were used as a loading control.

719  
720

721 **Figure 4. Autophagic degradation of Med13 requires the nucleoporin Gle1 and is**  
722 **independent of known nucleophagy pathways.**

723 **A** Western blot analysis of Med13-GFP cleavage assays after 4 h nitrogen depletion in micro-  
724 nucleophagy (*nvj1Δ*, RSY2106) and macro-nucleophagy (*atg39Δ atg40Δ*, RSY2123) mutants. An  
725 asterisk indicates a nonspecific proteolytic fragment unrelated to autophagy and Pgk1 protein levels  
726 were used as a loading control.

727 **B** Co-immunoprecipitation analysis of endogenous Gle1-GFP and Med13-3HA. Whole cell lysates  
728 were immunoprecipitated with the antibodies shown from nitrogen-starved *pep4Δ prb1Δ.1* cells  
729 expressing endogenous Gle1-GFP (RSY2423) and Med13-3HA (pKC801, lanes 1 and 4) or a  
730 vector control (lane 2). *pep4Δ prb1Δ.1* cells expressing Med13-3HA alone (lane 3) was included as  
731 a control. [ ] represents no antibody control. Med13-HA was detected by Western blot analysis of  
732 immunoprecipitates. Western blot analysis of the proteins in the whole cell lysates for the three  
733 conditions tested is shown (input - bottom panel).

734 **C** Map of Med13 depicting different structural regions and known interacting proteins (upper panel).  
735 Different colors represent different regions of the protein and structural regions are denoted by  
736 amino acid positions. Med13-Gle1 Y2H analysis. Y2H Gold cells harboring Gal4-BD-Gle1 and the  
737 indicated Gal4-AD-Med13 subclone or empty vector control were streaked on medium selecting for  
738 plasmid maintenance (left) or induction of the *ADE2* and *HIS3* reporter genes (right) by Y2H  
739 interaction (lower panel). See Fig EV5A, B for Western blot analysis of the different constructs.

740 **D** *pep4Δ prb1Δ.1* cells expressing endogenous Med13-mNeongreen and endogenous Gle1-  
741 RedStar (RSY2450) were starved for nitrogen for 2 h and monitored by fluorescence microscopy.  
742 Deconvolved representative images are shown. The yellow arrow is pointing to Med13-GFP in the  
743 vacuole whereas the blue arrow shows co-localization. OE represents an over-exposed image to  
744 better show the colocalization of Gle1 and Med13 (pink arrows) Scale = 5μm.

745 **E** Med13-GFP cleavage assays performed in the Gle1 Auxin-inducible degron (Gle1-AID) strain  
746 (RSY2456). Cells expressing Med13-GFP (pSW320) were treated with 250 μM Auxin for 30 m

747 before proceeding with autophagic cleavage assays in SD-N. Free GFP accumulation was then  
748 detected using Western blot analysis.

749 **F** Fluorescence microscopy of Med13-mNeogreen localization in the Gle1 Auxin-inducible degra-  
750 (Gle1-AID) strain expressing Nab2-mCherry before and after SD-N. An 8 h time point was used as  
751 the strain background is BY4741 which is not as sensitive to environmental stress as W303a. Scale  
752 = 5  $\mu$ m.

753

754 **Figure 5. The sorting nexin heterodimer, Snx4-Atg20 is required for efficient autophagic**  
755 **degradation of Med13.**

756 **A** Western blot analysis of Med13-GFP cleavage assays after 4 h nitrogen starvation in wild-type  
757 and *snx4* $\Delta$  (RSY2272).

758 **B** Co-immunoprecipitation analysis of GFP-Snx4 and Med13-3HA. Whole cell lysates were  
759 immunoprecipitated with the antibodies shown from nitrogen-starved *pep4* $\Delta$  *prb1* $\Delta.1$  cells  
760 expressing GFP-Snx4 (RSY2299) and Med13-3HA (pKC801, lanes 1 and 2) or a vector control  
761 (lane 4). *Pep4* $\Delta$  *prb1* $\Delta.1$  cells expressing Med13-3HA alone (lane 3) was included as a control. [ ]  
762 represents no antibody control. Med13-HA was detected by Western blot analysis of  
763 immunoprecipitates. Western blot analysis of the proteins in the whole cell lysates for the three  
764 conditions tested is shown (input - bottom panel).

765 **C** Western blot analysis of extracts prepared from wild-type (RSY2211), *snx4* $\Delta$  (RSY2276), *atg20* $\Delta$   
766 (RSY2277) and *snx41* $\Delta$  (RSY2394) expressing endogenous Med13-9Myc resuspended in SD-N  
767 for the indicated times. Pgk1 was used as a loading control.

768 **D** Degradation kinetics and half-lives of Med13 protein levels obtained in B. Error bars indicate  
769 S.D., N=3 of biologically independent experiments.

770 **E** Fluorescence microscopy of endogenous Med13-mNeogreen localization in *snx4* $\Delta$  *pep4* $\Delta$   
771 *prb1* $\Delta.1$  (RSY2324) expressing the vacuole marker Vph1-mCherry. Cells were visualized before

772 (SD) and after 2 h of SD-N treatment and representative single plane images are shown. Scale =  
773 5  $\mu$ m.

774 **F** As in D except that endogenous Med13-mNeongreen localization was followed in nitrogen-  
775 starved *pep4 $\Delta$  prb1 $\Delta$ .1* cells. Representative single plane images of the results are shown. Bar =  
776 5 $\mu$ m.

777 **G** Quantification of accumulation of Med13-mNeongreen in vacuoles obtained from results in D  
778 and E. 100 cells counted per sample. N=3 biological samples. \*\*\*\*  $P = >0.0001$ .

779

780 **Figure 6. Snx4 localizes to the nuclear periphery to retrieve Med13.**

781 **A** Co-immunoprecipitation analysis of endogenous Atg17-GFP and Med13-3HA in the presence  
782 and absence of Snx4. Whole cell lysates were immunoprecipitated with the antibodies shown from  
783 nitrogen-starved *pep4 $\Delta$  prb1 $\Delta$ .1* (RSY2395) or *snx4 $\Delta$  pep4 $\Delta$  prb1 $\Delta$ .1* cells (RSY2396) expressing  
784 endogenous Atg17-GFP and Med13-3HA (pKC801, lanes 1, 2 and 6) or a vector control (lanes 4  
785 & 5). *Pep4 $\Delta$  prb1 $\Delta$ .1* cells expressing Med13-3HA alone (lane 3) was included as a control. [ ]  
786 represents no antibody control. Med13-HA was detected by Western blot analysis of  
787 immunoprecipitates. Western blot analysis of the proteins present in the whole cell lysates for the  
788 conditions tested is shown (input - bottom panel).

789 **B** Representative images showing perinuclear and perivacuolar localization of GFP-Snx4 in wild-  
790 type expressing Nab2-mCherry (nuclear marker) before and after nitrogen starvation. Bar = 5 $\mu$ m.  
791 The number of perinuclear foci was counted (N=2) before and after nitrogen starvation. At least  
792 100 cells were counted per sample. Data are the percentage of perinuclear foci among the total  
793 number of foci. Scale = 5  $\mu$ m.

794 **C** Fluorescence microscopy of *pep4 $\Delta$  prb1 $\Delta$ .1* cells expressing endogenous Med13-mNeongreen  
795 and mCherry-Snx4 (RSY2424) before and after nitrogen depletion. Hoechst staining was used to  
796 visualize the nucleus. Representative deconvolved images are shown. Bar = 5 $\mu$ m.

797 **D** GFP-Snx4 and endogenous Gle1-RedStar co-localize in wild-type cells (RSY2451) following  
798 nitrogen starvation. Representative images are shown. Bar = 5µm.

799

800 **Figure 7. The BAR domain of Snx4 interacts with the C-terminal region of Med13.**

801 **A** Fluorescence microscopy of Crn1-Med13-GFP (pSW288) in wild-type cells growing in SD.  
802 Hoechst staining was used to visualize the nucleus. Bar = 5µm.

803 **B** Western blot analysis of Med13-GFP (pSW218) or Crn1-Med13-GFP (pSW288) cleavage assays  
804 performed in wild-type or *snx4*Δ cells following nitrogen starvation.

805 **C** Western blot analysis of GFP-Snx4 cleavage assays performed in wild-type (RSY2283) and  
806 *pep4*Δ (RSY2299) cells following nitrogen starvation.

807 **D** Western blot analysis of Gle1-GFP cleavage assays performed in wild-type (RSY2455) cells  
808 following prolonged nitrogen starvation (24 h).

809 **E** Western blot analysis of Med13-GFP (pSW218) cleavage assays performed in wild-type cells.  
810 Pgk1 was used as a protein loading control for all experiments.

811 **F** Y2H Gold cells harboring Gal4-BD-Snx4 and the indicated Gal4-AD-Med13 construct or vector  
812 control were plated on medium selecting for plasmid maintenance (*-LEU, -TRP*) (top) or interaction  
813 by induction of the *ADE2* and *HIS3* reporter genes (bottom). See Fig EV5A, B for Western blot  
814 analysis of the different constructs.

815 **G** Predicted structural analysis of the Med13 tail region using Phyre2 plot analysis of this region  
816 (Kelley *et al.*, 2015). Y2H analysis of full-length Gal4-BD-Snx4 and Gal4-AD-Med13 subclones  
817 containing either the first or second domain region of the Med13 tail. Cells were streaked on  
818 medium selecting for plasmid maintenance (left) or induction of reporter genes (right) by Y2H  
819 interaction.

820 **H** Map of Snx4 depicting known domains (left panel). Y2H analysis of Snx4 PX and BAR binding  
821 domain constructs with the Med13<sup>907-1163</sup>AD construct and empty vector. Cells were streaked on

822 medium selecting for plasmid maintenance (left) or induction of reporter genes (right) by Y2H  
823 interaction (right panel).

824

825 **Figure 8. Transcription factors regulating ATG genes are nucleophagy substrates.**

826 **A** RT-qPCR analysis probing for *ATG8*, *ATG1* and *ATG14* mRNA expression in wild-type and  
827 *med13* $\Delta$  (RSY2444) cells in unstressed conditions.  $\Delta\Delta C_t$  results for relative fold change ( $\log_2$ )  
828 values using wild-type unstressed cells as a control. Transcript levels are given relative to the  
829 internal *ACT1* mRNA control.

830 **B** Western blot analysis of Rim15-GFP (pFD846) cleavage assays in indicated mutants after  
831 nitrogen starvation. The asterisk denotes a background band.

832 **C** Western blot analysis of Ccl1-GFP (pSW230) and Msn2-GFP (pSW217) cleavage assays in wild-  
833 type or *snx4* $\Delta$  cells. Pgk1 protein levels were used as a loading control in all experiments.

834 **D** Summary model of novel Snx4-mediated nucleophagy mechanism that selectively targets  
835 transcription factors for autophagic degradation. In unstressed cells the CKM represses a subset  
836 of *ATG* genes. Following nitrogen starvation an unknown signal triggers the CKM to disassembly.  
837 Med13 is transported by unknown mechanisms through the NPC to the cytoplasmic nucleoporin  
838 Gle1. Gle1 releases Med13 to the Snx4-Atg20 heterodimer where it interacts with the Snx4 BAR  
839 domains (see insert), which in turn interacts with the Atg17 scaffold protein found on growing PAS  
840 structures.

841

842

843

844

Figure 1

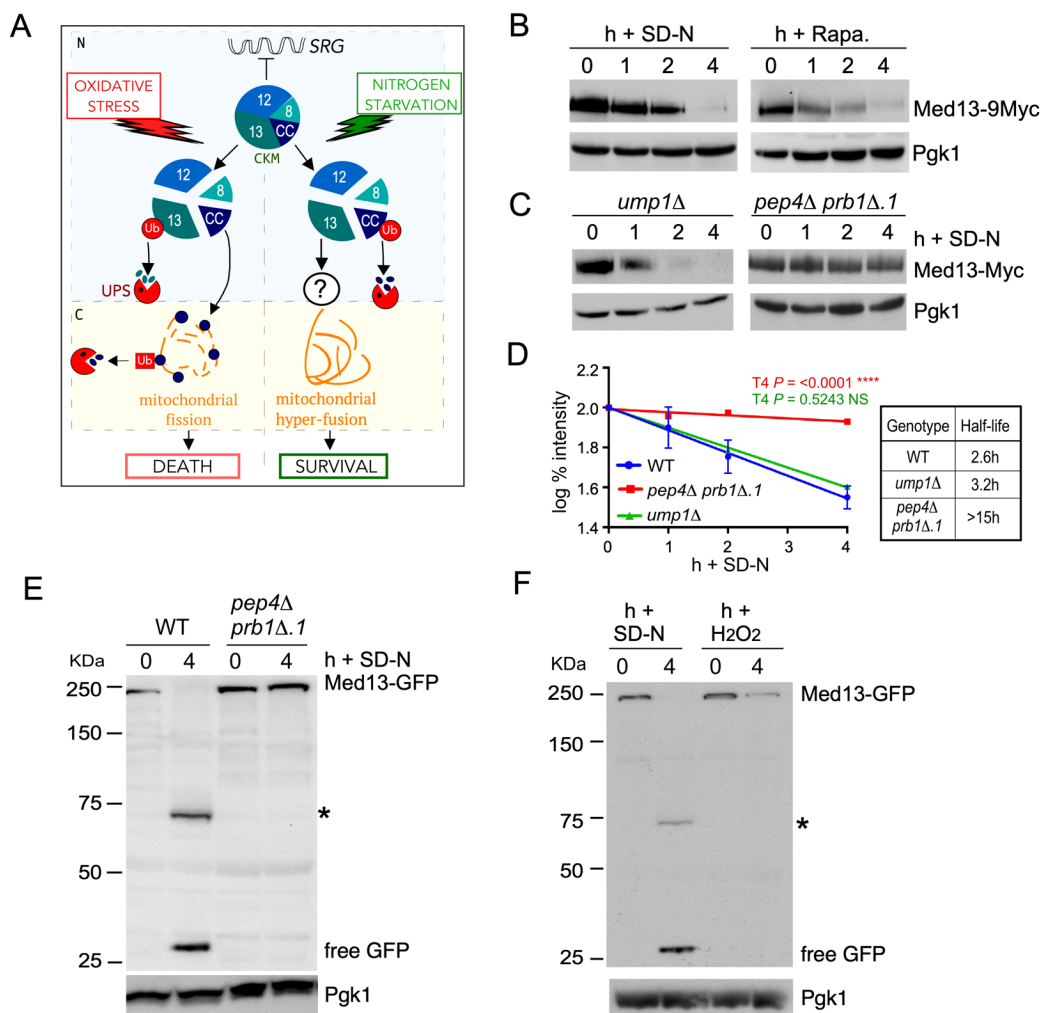

845

Figure 2

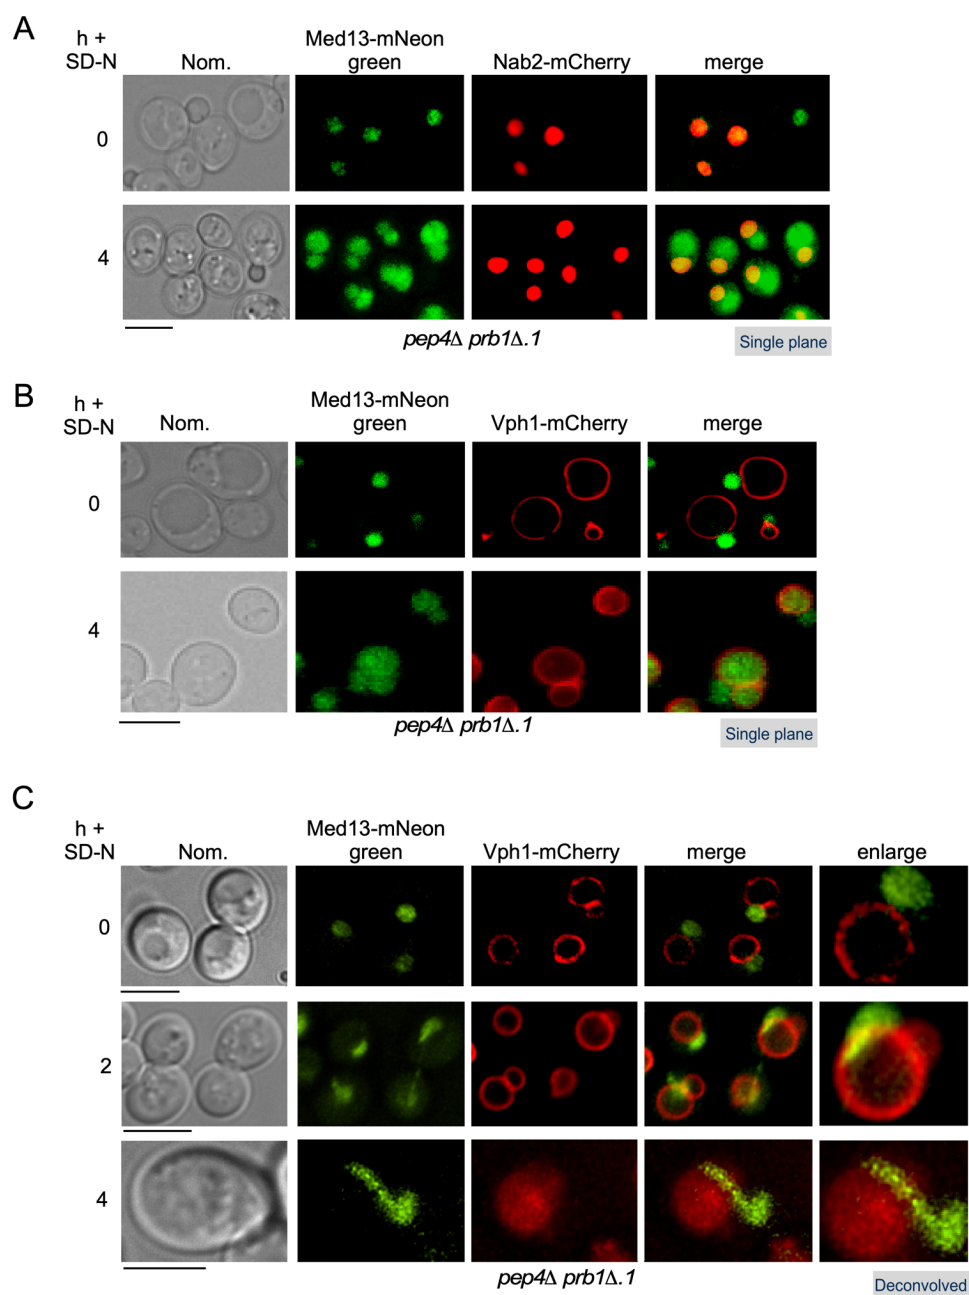



Figure 3

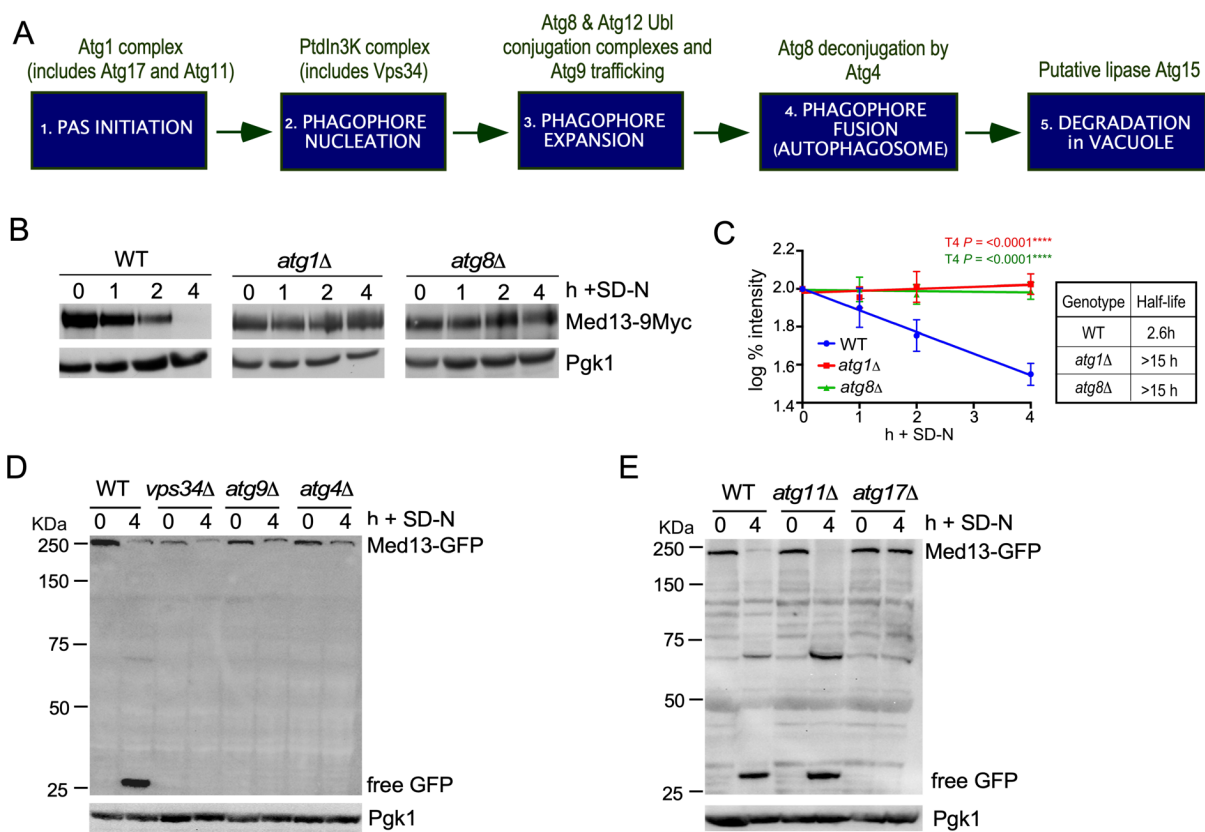

846

847

848

Figure 4

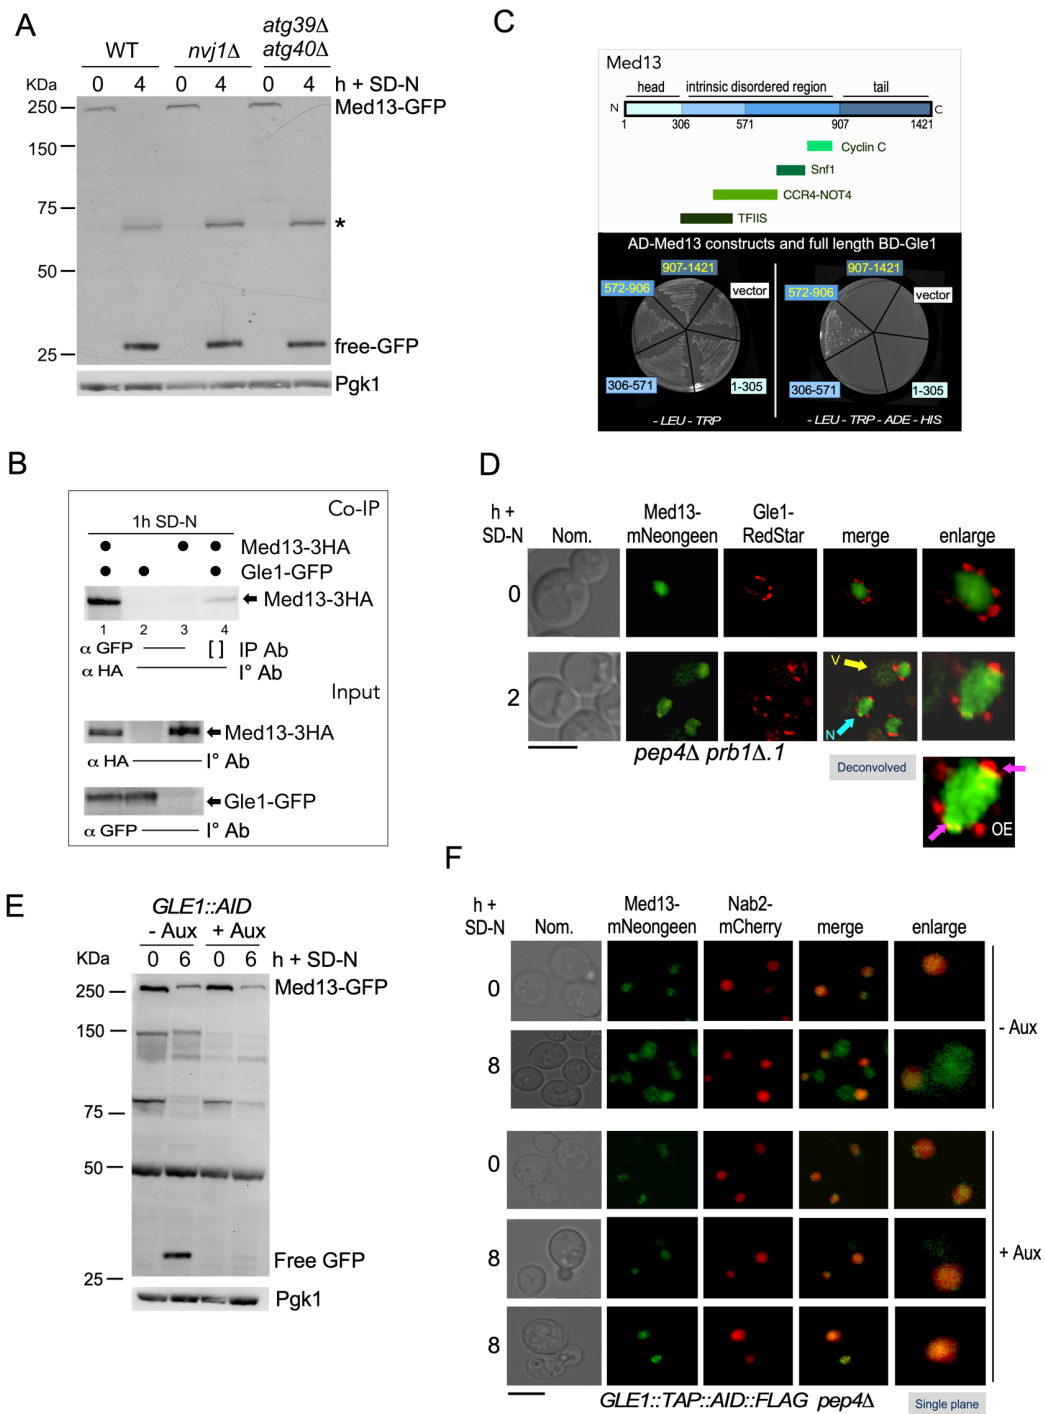

Figure 5

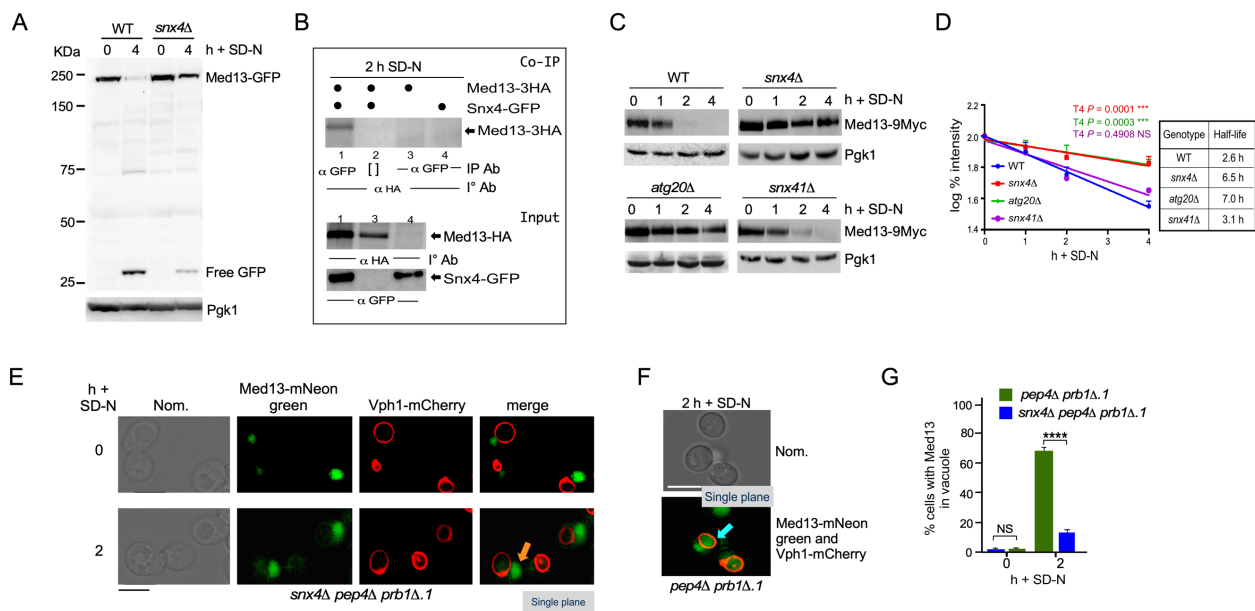

850

Figure 6

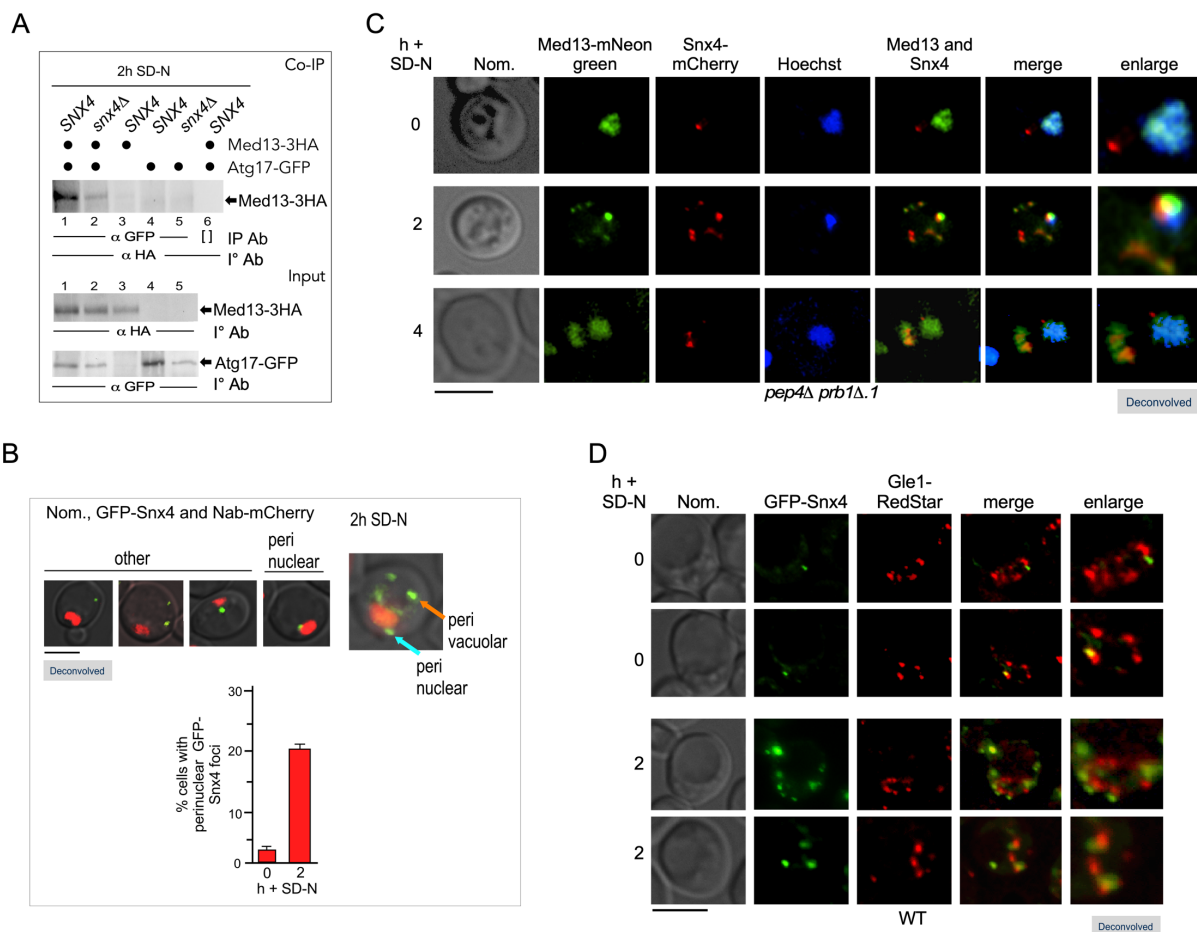

851

Figure 7

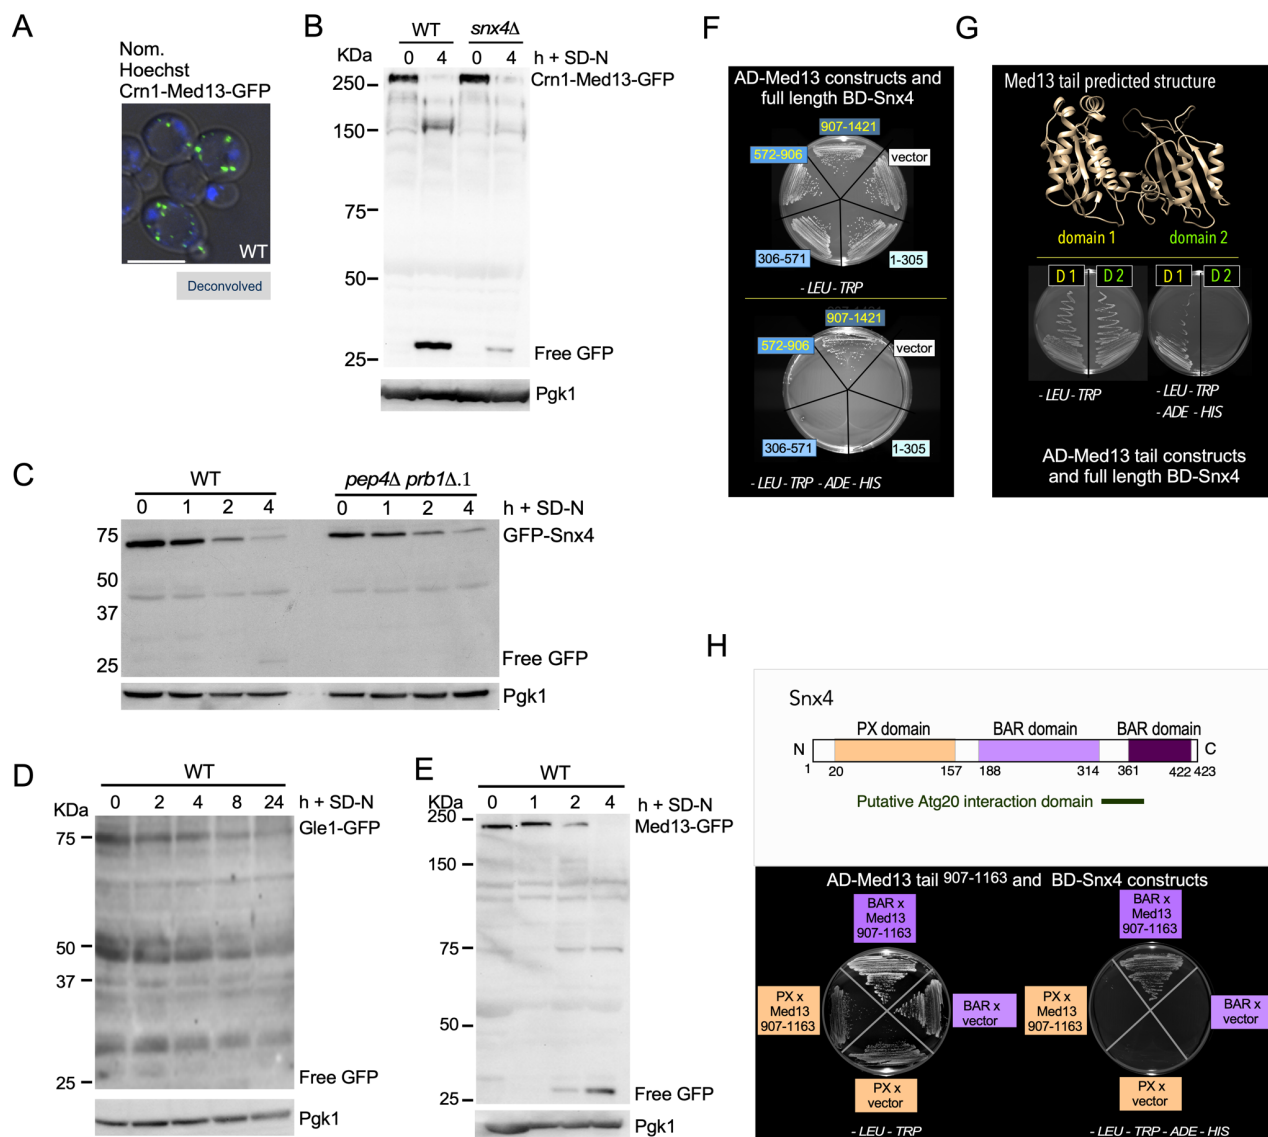

852

Figure 8

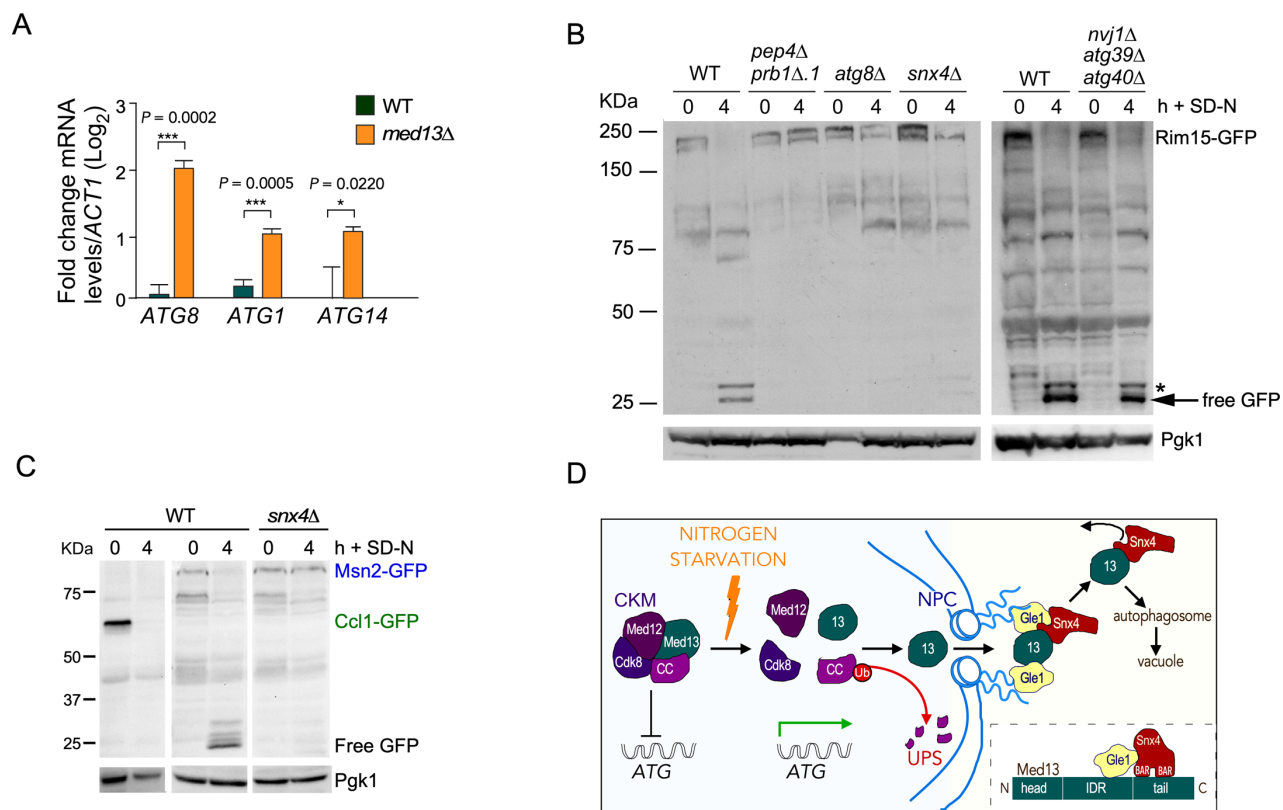

853

854

855 **Supplementary Information**

856 **Supplemental Table I.** Candidate proteins that interact with Med13 after 90 min 200mM rapamycin  
 857 treatment.

| Select proteins obtained from Mass Spectroscopy where:<br>Counts were greater than 2-fold after 90 minutes of 200 ng/mL Rapamycin |               |                                   | Counts     |             |
|-----------------------------------------------------------------------------------------------------------------------------------|---------------|-----------------------------------|------------|-------------|
| <b>Systematic Name</b>                                                                                                            | <b>Gene</b>   | <b>Protein Function</b>           | <b>T=0</b> | <b>T=90</b> |
| <b>Other</b>                                                                                                                      |               |                                   |            |             |
| YER155C                                                                                                                           | <i>BEM2</i>   | RhoGAP                            | 47         | 203         |
| YJL005W                                                                                                                           | <i>CYR1</i>   | Adenylate cyclase                 | 19         | 50          |
| YHR016C                                                                                                                           | <i>YSC84</i>  | Actin-binding protein             | 7          | 18          |
| YNL271C                                                                                                                           | <i>BNI1</i>   | Formin                            | 5          | 13          |
| YBR140C                                                                                                                           | <i>IRA1</i>   | GTPase activator                  | 1          | 12          |
| YDR103W                                                                                                                           | <i>STE5</i>   | MAPK scaffold                     | 4          | 12          |
| YGR032W                                                                                                                           | <i>GSC2</i>   | spore wall assembly               | 1          | 9           |
| YDL198C                                                                                                                           | <i>GGC1</i>   | Mitochondrial GTP/GDP transporter | 3          | 7           |
| <b>Nuclear Activity</b>                                                                                                           |               |                                   |            |             |
| YPR018W                                                                                                                           | <i>RLF2</i>   | Chromatin assembly                | 21         | 44          |
| YPL155C                                                                                                                           | <i>KIP2</i>   | Kinesin                           | 6          | 34          |
| YDL140C                                                                                                                           | <i>RPO21</i>  | RNA Polymerase II Subunit         | 13         | 33          |
| YML065W                                                                                                                           | <i>ORC1</i>   | DNA replication                   | 14         | 32          |
| YNL278W                                                                                                                           | <i>CAF120</i> | Transcriptional regulation        | 7          | 27          |
| YDR216W                                                                                                                           | <i>ADR1</i>   | Transcription factor              | 12         | 26          |

|                             |              |                                |    |     |
|-----------------------------|--------------|--------------------------------|----|-----|
| YER040W                     | <i>GLN3</i>  | Transcriptional activator      | 10 | 23  |
| YDR364C                     | <i>CDC40</i> | mRNA Splicing                  | 7  | 15  |
| YGL045W                     | <i>RIM8</i>  | Activates Rim101               | 6  | 13  |
| YER088C                     | <i>DOT6</i>  | DNA Binding Protein            | 3  | 12  |
| YDL089W                     | <i>NUR1</i>  | Mitotic Exit/Nuclear Periphery | 3  | 9   |
| YDL207W                     | <i>GLE1</i>  | Cytoplasmic nucleoporin        | 3  | 9   |
| YDL220C                     | <i>CDC13</i> | Telomere capping               | 4  | 9   |
| <b>Vacuole</b>              |              |                                |    |     |
| YJL172W                     | <i>CPS1</i>  | Vacuolar carboxypeptidase      | 4  | 18  |
| YPR036W                     | <i>VMA13</i> | V-ATPase                       | 4  | 12  |
| YDR128W                     | <i>MTC5</i>  | Vacuole/TORC1                  | 3  | 8   |
| YLL048C                     | <i>YBT1</i>  | Vacuole Fusion                 | 2  | 8   |
| <b>Kinase/Phosphatase</b>   |              |                                |    |     |
| YDR283C                     | <i>GCN2</i>  | Kinase                         | 78 | 160 |
| YHR082C                     | <i>KSP1</i>  | Kinase                         | 25 | 60  |
| YKL168C                     | <i>KKQ8</i>  | Kinase                         | 13 | 36  |
| YDR122W                     | <i>KIN1</i>  | Kinase                         | 4  | 28  |
| YOR039W                     | <i>CKB2</i>  | Kinase                         | 8  | 26  |
| YDL025C                     | <i>RTK1</i>  | Kinase                         | 3  | 18  |
| YOR061W                     | <i>CKA2</i>  | Kinase                         | 5  | 15  |
| YGL019W                     | <i>CKB1</i>  | Kinase                         | 4  | 13  |
| YMR165C                     | <i>PAH1</i>  | Phosphatase                    | 4  | 13  |
| YIL035C                     | <i>CKA1</i>  | Kinase                         | 5  | 12  |
| YAR014C                     | <i>BUD14</i> | Protein phosphatase regulator  | 3  | 7   |
| <b>Anabolism/Catabolism</b> |              |                                |    |     |



|                            |               |                                      |    |     |
|----------------------------|---------------|--------------------------------------|----|-----|
| YLR044C                    | <i>PDC1</i>   | Pyruvate decarboxylase               | 57 | 200 |
| YKL182W                    | <i>FAS1</i>   | Fatty acid synthetase                | 35 | 94  |
| YKL060C                    | <i>FBA1</i>   | Glycolysis                           | 26 | 62  |
| YEL071W                    | <i>DLD3</i>   | Lactate Dehydrogenase                | 16 | 40  |
| YBR196C                    | <i>PGI1</i>   | Phosphoglucose isomerase             | 3  | 29  |
| YLR304C                    | <i>ACO1</i>   | Aconitase                            | 10 | 25  |
| YLR153C                    | <i>ACS2</i>   | Acetyl-coA synthetase                | 8  | 24  |
| YOR136W                    | <i>IDH2</i>   | Isocitrate dehydrogenase complex     | 7  | 22  |
| YBR208C                    | <i>DUR1,2</i> | Urea amidolyase                      | 0  | 21  |
| YLR355C                    | <i>ILV5</i>   | Amino acid biosynthesis              | 1  | 19  |
| YGL009C                    | <i>LEU1</i>   | Leucine biosynthesis                 | 7  | 17  |
| YKL218C                    | <i>SRY1</i>   | Amino Acid Catabolism                | 2  | 15  |
| YGL245W                    | <i>GUS1</i>   | tRNA synthetase                      | 2  | 15  |
| YER024W                    | <i>YAT2</i>   | Acetyltransferase/mitochondria       | 1  | 11  |
| YBR221C                    | <i>PDB1</i>   | Pyruvate Dehydrogenase               | 3  | 10  |
| YDR341C                    | YDR341C       | Arginyl-tRNA synthetase/mitochondria | 1  | 9   |
| YIL128W                    | <i>MET18</i>  | Methionine biosynthesis/CIA Complex  | 2  | 9   |
| YGL001C                    | <i>ERG26</i>  | Ergosterol biosynthesis              | 3  | 7   |
| YJL060W                    | <i>BNA3</i>   | Aminotransferase                     | 3  | 7   |
| <b>Protein Trafficking</b> |               |                                      |    |     |
| YNL287W                    | <i>SEC21</i>  | COPI vesicle coat                    | 9  | 23  |

|                         |                |                                     |    |    |
|-------------------------|----------------|-------------------------------------|----|----|
| YBR102C                 | <i>EXO84</i>   | ExoCytosis/Splicesome<br>Assembly   | 3  | 19 |
| YBL037W                 | <i>APL3</i>    | Intracellular protein transport     | 5  | 13 |
| YNL049C                 | <i>SFB2</i>    | COPII vesicle coat                  | 5  | 12 |
| YNL246W                 | <i>VPS75</i>   | Histone chaperone                   | 4  | 12 |
| YHR103W                 | <i>SBE22</i>   | Golgi /Bud Growth                   | 2  | 11 |
| YLR114C                 | <i>AVL9</i>    | Exocytic transport                  | 3  | 9  |
| YDR483W                 | <i>KRE2</i>    | Golgi mannosyltransferase           | 2  | 8  |
| YJL036W                 | <i>SNX4</i>    | Sorting Nexin/CVT                   | 2  | 8  |
| YDR171W                 | <i>HSP42</i>   | Chaperone                           | 3  | 7  |
| YDR186C                 | <i>SND1</i>    | ER Targeting                        | 3  | 7  |
| <b>Ribosome</b>         |                |                                     |    |    |
| YPL009C                 | YPL009C        | Ribosome quality control<br>complex | 14 | 63 |
| YKL014C                 | <i>URB1</i>    | Ribosome biogenesis                 | 20 | 47 |
| YGR162W                 | <i>TIF4631</i> | Translation initiation factor       | 12 | 37 |
| YDR333C                 | <i>RQC1</i>    | Ribosome Quality Control            | 13 | 31 |
| YMR049C                 | <i>ERB1</i>    | Ribosome Biogenesis                 | 13 | 28 |
| YJR041C                 | <i>URB2</i>    | Ribosome biogenesis                 | 1  | 11 |
| YNL224C                 | <i>SQS1</i>    | Ribosome Biogenesis                 | 4  | 9  |
| <b>Unknown Function</b> |                |                                     |    |    |
| YPL032C                 | <i>SVL3</i>    | Unknown Function/Vacuole            | 16 | 59 |
| YER047C                 | <i>SAP1</i>    | Unknown/AAA ATPase                  | 21 | 53 |
| YGR237C                 | YGR237C        | Unknown Function                    | 11 | 28 |
| YLR187W                 | <i>SKG3</i>    | Unknown Function                    | 9  | 19 |

|                               |              |                           |   |    |
|-------------------------------|--------------|---------------------------|---|----|
| YLR219W                       | <i>MSC3</i>  | Unknown Function          | 8 | 18 |
| YBR007C                       | <i>DSF2</i>  | Unknown/Bud Tip           | 5 | 15 |
| YOR093C                       | YOR093C      | Unknown Function          | 6 | 15 |
| YBR225W                       | YBR225W      | Unknown/Cell Wall         | 5 | 13 |
| YDR251W                       | <i>PAM1</i>  | Unknown Function          | 2 | 13 |
| YGR196C                       | <i>FYV8</i>  | Unknown Function          | 4 | 11 |
| YDR239C                       | YDR239C      | Unknown Function/Ribosome | 2 | 9  |
| <b>Transporters/Permeases</b> |              |                           |   |    |
| YDR345C                       | <i>HXT3</i>  | glucose transporter       | 7 | 22 |
| YKR093W                       | <i>PTR2</i>  | Peptide Transporter       | 6 | 21 |
| YKR039W                       | <i>GAP1</i>  | Amino Acid Permease       | 4 | 20 |
| YJR152W                       | <i>DAL5</i>  | Allantoate permease       | 0 | 15 |
| YCL025C                       | <i>AGP1</i>  | amino acid permease       | 4 | 11 |
| <b>Ubiquitin</b>              |              |                           |   |    |
| YBL067C                       | <i>UBP13</i> | Ubiquitin Protease        | 7 | 19 |
| YEL012W                       | <i>UBC8</i>  | Ubiquitin Conjugating     | 7 | 16 |
| YDL126C                       | <i>CDC48</i> | ATPase/Ubiquitin Binding  | 6 | 15 |
| YDL122W                       | <i>UBP1</i>  | Ubiquitin Protease        | 3 | 11 |
| YDR328C                       | <i>SKP1</i>  | Ubiquitin Ligase          | 3 | 9  |
| YML088W                       | <i>UFO1</i>  | F-box receptor protein    | 2 | 8  |

858

859

860 **Supplemental Table II** Yeast strains used in this study.

| Strain*         | Genotype                                                            | Source                                        |
|-----------------|---------------------------------------------------------------------|-----------------------------------------------|
| RSY10*          | <i>MATa ade2 ade6 can1-10 his3-11, 15 leu2-3, 112 trp1-1 ura3-1</i> | (Strich <i>et al.</i> , 1989)                 |
| RSY1812*        | <i>MED13-yECitrine::KanMX6</i>                                      | (Khakhina <i>et al.</i> , 2014)               |
| BJ5459**/RSY449 | <i>pep4::HIS3 prb1-Δ1.6R</i>                                        | (Zubenko <i>et al.</i> , 1983)                |
| RSY1961*        | <i>ump1::HIS3 MED13-13Myc::KanMX4</i>                               | (Khakhina <i>et al.</i> , 2014)               |
| RSY2000         | <i>gal4Δ gal80Δ LYS2::GAL1-HIS3 GAL2-Ade2 URA3-MEL1 AUR1-C MEL1</i> | Clone Tech Y2H Gold Yeast Strain Cat. #630498 |
| RSY2094*        | <i>atg1::KanMX4</i>                                                 | This study                                    |
| RSY2104*        | <i>atg17::KanMX4</i>                                                | This study                                    |
| RSY2106*        | <i>nvj1::KanMX4</i>                                                 | This study                                    |
| RSY2160*        | <i>ump1::KanMX4</i>                                                 | (Willis <i>et al.</i> , 2020)                 |
| RSY2123*        | <i>atg39::KanMX4 atg40Δ::NatNT2</i>                                 | This study                                    |
| RSY2202*        | <i>atg1::KanMX4 ump1::NatNT2</i>                                    | This study                                    |
| RSY2211*        | <i>MED13-9Myc::NatNT2</i>                                           | This study                                    |
| RSY2213*        | <i>nvj1::KanMX4 MED13-9Myc::NatNT2</i>                              | This study                                    |
| RSY2214*        | <i>atg1::KanMX4 MED13-9Myc::NatNT2</i>                              | This study                                    |
| RSY2215**       | <i>pep4::HIS3 prb1-Δ1.6R MED13-9Myc::NatNT2</i>                     | This study                                    |

---

|           |                                                                              |            |
|-----------|------------------------------------------------------------------------------|------------|
| RSY2231*  | <i>atg8::KanMX4 MED13-9Myc::NatNT2</i>                                       | This study |
| RSY2248*  | <i>atg11::KanMX4</i>                                                         | This study |
| Rsy2272*  | <i>snx4::HphNT1</i>                                                          | This study |
| RSY2276*  | <i>snx4::HphNT1 MED13-9Myc::NatNT2</i>                                       | This study |
| RSY2277*  | <i>atg20::KanMX4 MED13-9Myc::NatNT2</i>                                      | This study |
| RSY2283*  | <i>ADH-GFP-SNX4::NatNT2</i>                                                  | This study |
| RSY2299*  | <i>pep4:: KanMX4 ADH-GFP-SNX4::NatNT2</i>                                    | This study |
| RSY2305** | <i>pep4::HIS3 prb1-Δ1.6R</i><br><i>MED13-mNeogreen::NatNT2</i>               | This study |
| RSY2324** | <i>pep4::HIS3 prb1-Δ1.6R snx4Δ::HphNT1</i><br><i>MED13-mNeogreen::NatNT2</i> | This study |
| RSY2348*  | <i>PTetO7-Ubi-Leu::3HA-CRM1::NatMX4</i><br><i>MED13-9Myc::HphNT1</i>         | This study |
| RSY2349*  | <i>atg39::KanMX4 atg40::NatNT2 MED13-9Myc::HphNT1</i>                        | This study |
| RSY2373*  | <i>atg17::KanMX4 MED13-9Myc::NatNT2</i>                                      | This study |
| RSY2394*  | <i>snx41::HIS3 MED13-9Myc::NatNT2</i>                                        | This study |
| RSY2395** | <i>pep4::HIS3 prb1-Δ1.6R ATG17-GFP::HphNT1</i>                               | This study |
| RSY2396** | <i>pep4::HIS3 prb1-Δ1.6R snx4::KanMX4</i>                                    | This study |

---

---

| <i>ATG17-GFP::HphNT1</i> |                                                                                         |                               |
|--------------------------|-----------------------------------------------------------------------------------------|-------------------------------|
| RSY2399*                 | <i>msn5::KanMX4 MED13-9Myc::NatNT2</i>                                                  | This study                    |
| RSY2400**                | <i>pep4::HIS3 prb1-Δ1.6R MED13-<br/>mNeogreen::HphNT1 ATG17-<br/>RedStar::NatNT2</i>    | This study                    |
| RSY2423**                | <i>pep4::HIS3 prb1-Δ1.6R GLE1-GFP::HphNT1</i>                                           | This study                    |
| RSY2424**                | <i>pep4::HIS3 prb1-Δ1.6R<br/>MED13-mNeogreen::HphNT1 ADH1-<br/>mCherry-SNX4::NatNT2</i> | This study                    |
| RSY2444*                 | <i>med13::HIS3</i>                                                                      | This study                    |
| RSY2450**                | <i>pep4::HIS3 prb1-Δ1.6R<br/>MED13-mNeogreen::NatNT2 GLE1-<br/>RedStar::KanMX4</i>      | This study                    |
| RSY2451*                 | <i>ADH1-GFP-SNX4::NatNT2 GLE1-<br/>RedStar::KanMX4</i>                                  | This study                    |
| RSY2455*                 | <i>GLE1-GFP::HphNT1</i>                                                                 | This study                    |
| RSY2456                  | <i>his3Δ1 leu2Δ met15Δ ura3Δ GLE1-TAP-AID-<br/>FLAG::Ura3</i>                           | (Snyder <i>et al.</i> , 2019) |

---

---

|         |                                                |                     |
|---------|------------------------------------------------|---------------------|
| RSY2473 | <i>his3Δ1 leu2Δ met15Δ ura3Δ GLE1-TAP-AID-</i> | This study          |
|         | <i>FLAG::Ura3 pep4::KanMX4 MED13-</i>          |                     |
|         | <i>mNeonGreen::NatNT2</i>                      |                     |
| BY4741  | <i>MATa his3Δ1 leu2Δ met15Δ ura3Δ</i>          | (Chu & Davis, 2008) |
|         | <i>atg4::KANMX4</i>                            |                     |
|         | <i>atg9::KANMX4</i>                            |                     |
|         | <i>atg19:: KANMX4</i>                          |                     |
|         | <i>atg32::KANMX4</i>                           |                     |
|         | <i>atg36:: KANMX4</i>                          |                     |
|         | <i>cue5::KANMX4</i>                            |                     |
|         | <i>vps34::KANMX4</i>                           |                     |

---

861 \*Genotype of all stains is *MATa ade2 ade6 can1-10 his3-11, 15 leu2-3, 112 trp1-1 ura3-1* (W303).

862 \*\*Genotype of all strains is *MATa his3-Δ200 can1 ura3-52 leu2Δ1 lys2-801 trp1-289* (BJ5459). The

863 *atg19, atg36, csm1, heh1, lrs4, and nur1* strains are from the yeast knock out collection (Chu and

864 Davis, 2008) and are derived from BY4741 (*MATa his3Δ1 leu2Δ met15Δ ura3Δ*).

865

866 **Extended Data Table III** Plasmids used in this study.

| Plasmid Name | Gene                                    | Epitope Tag | Marker | Promoter    | 2 $\mu$ /CEN/int | Reference                    |
|--------------|-----------------------------------------|-------------|--------|-------------|------------------|------------------------------|
| pKC801       | <i>MED13</i>                            | 3HA         | URA3   | <i>ADH1</i> | CEN              | (Stieg <i>et al.</i> , 2018) |
| pDS2         | <i>GAL4AD-MED13</i> <sup>1-305</sup>    | 1HA         | LEU2   | <i>ADH1</i> | 2 $\mu$          | (Stieg <i>et al.</i> , 2018) |
| pDS4         | <i>GAL4AD-MED13</i> <sup>907-1421</sup> | 1HA         | LEU2   | <i>ADH1</i> | 2 $\mu$          | (Stieg <i>et al.</i> , 2018) |
| pDS7         | <i>GAL4AD-MED13</i> <sup>306-570</sup>  | 1HA         | LEU2   | <i>ADH1</i> | 2 $\mu$          | (Stieg <i>et al.</i> , 2018) |
| pDS8         | <i>GAL4AD-MED13</i> <sup>571-906</sup>  | 1HA         | LEU2   | <i>ADH1</i> | 2 $\mu$          | (Stieg <i>et al.</i> , 2018) |
| pSH3         | <i>RPH1</i>                             | GFP         | URA3   | <i>ADH1</i> | CEN              | This study                   |
| pSH4         | <i>PGK1</i>                             | GFP         | URA3   | <i>ADH1</i> | CEN              | This study                   |
| pSH8         | <i>GAL4BD-SNX4</i>                      | 1HA         | TRP1   | <i>ADH1</i> | 2 $\mu$          | This study                   |



|          |                                                     |         |      |             |     |                                      |
|----------|-----------------------------------------------------|---------|------|-------------|-----|--------------------------------------|
| pSH16    | <i>GAL4BD-</i><br><i>SNX4</i> <sup>1-157</sup>      | 1HA     | TRP1 | <i>ADH1</i> | 2μ  | This study                           |
| pSH17    | <i>GAL4BD-</i><br><i>SNX4</i> <sup>157-423</sup>    | 1HA     | TRP1 | <i>ADH1</i> | 2μ  | This study                           |
| pSH18    | <i>GAL4AD-</i><br><i>MED13</i> <sup>907-1163</sup>  | 1HA     | LEU2 | <i>ADH1</i> | 2μ  | This study                           |
| pSH19    | <i>GAL4AD-</i><br><i>MED13</i> <sup>1163-1421</sup> | 1HA     | LEU2 | <i>ADH1</i> | 2μ  | This study                           |
| pSW217   | <i>MSN2</i>                                         | GFP     | URA3 | <i>ADH1</i> | CEN | This study                           |
| pSW218   | <i>MED13</i>                                        | GFP     | URA3 | <i>ADH1</i> | CEN | This study                           |
| pSW221   | <i>VPH1</i>                                         | mCherry | URA3 | <i>ADH1</i> | CEN | (Willis <i>et al.</i> ,<br>2020)     |
| pSW230   | <i>CCL1</i>                                         | GFP     | URA3 | <i>ADH1</i> | CEN | This study                           |
| pSW288   | <i>CRN1-MED13</i>                                   | GFP     | URA3 | <i>ADH1</i> | CEN | This study                           |
| pSW320   | <i>MED13</i>                                        | GFP     | HIS3 | <i>ADH1</i> | CEN | This study                           |
| RSB2507  | <i>NAB2</i>                                         | mCherry | LEU2 | <i>ADH1</i> | CEN | (Willis <i>et al.</i> ,<br>2020)     |
| pFD846   | <i>RIM15</i>                                        | GFP     | TRP1 | <i>ADH1</i> | CEN | (Wanke <i>et al.</i> ,<br>2005)      |
| GFP-Atg8 | <i>ATG8</i>                                         | GFP     | TRP1 | <i>Own</i>  | CEN | (Abeliovich <i>et al.</i> ,<br>2003) |

---

|        |            |   |      |              |     |                      |
|--------|------------|---|------|--------------|-----|----------------------|
| pCM188 | <i>TET</i> | - | URA3 | <i>ADH1-</i> | CEN | (Gari <i>et al</i> , |
|        |            |   |      | <i>Tet02</i> |     | 1997)                |

---

867

## Supplemental Figure 1

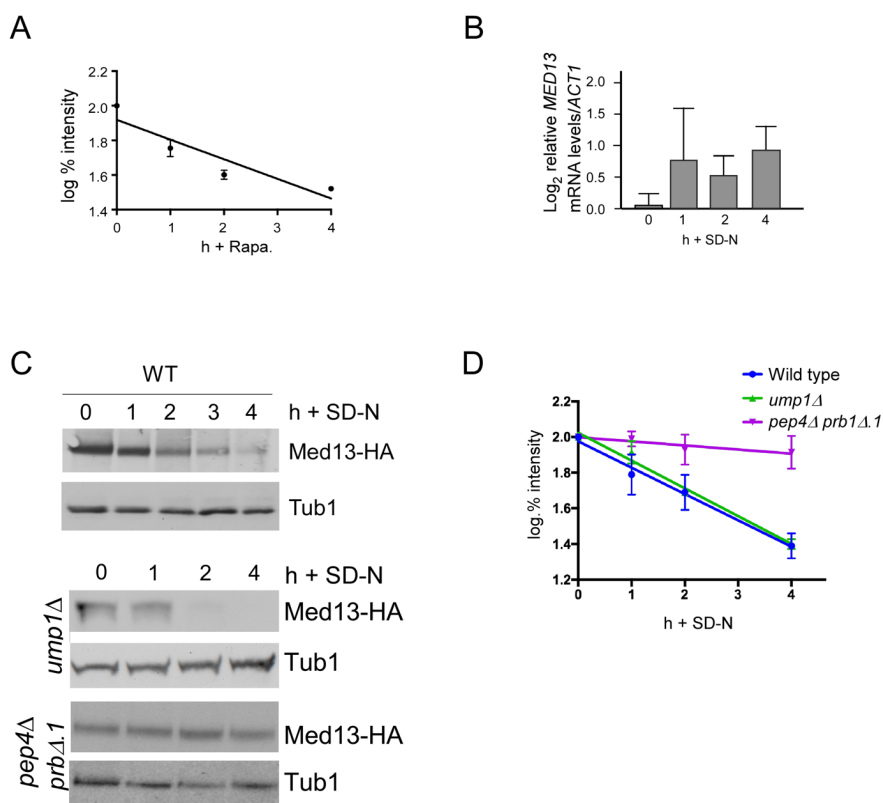

868 **Supplemental Figure 1. Med13 is degraded in response to rapamycin. A** Degradation kinetics  
 869 of endogenous Med13-9myc protein levels in wild-type cells treated with 200 ng/mL rapamycin.  
 870 Error bars indicate S.D., N=3 biological samples. **B** RT-qPCR analysis probing for *MED13* mRNA  
 871 expression in wild-type cells following nitrogen starvation.  $\Delta\Delta Ct$  results for relative fold change ( $\log_2$ )  
 872 values using wild-type unstressed cells as a control. Transcript levels are given relative to the  
 873 internal *ACT1* mRNA control. **C** Western blot analysis of Med13-3HA protein levels, expressed  
 874 from a single copy functional plasmid (Stieg *et al.*, 2018) (pKC801) in wild-type (RSY10), *ump1Δ*  
 875 (RSY2160) and *pep4Δ prb1Δ.1* (RSY449) cells following nitrogen starvation. Pgk1 was used as a  
 876 protein loading control in all experiments. **D** Quantification of Med13-3HA degradation kinetics in  
 877 indicated mutants obtained from c. Error bars indicate S.D., N=3 biological samples.

## Supplemental Figure 2

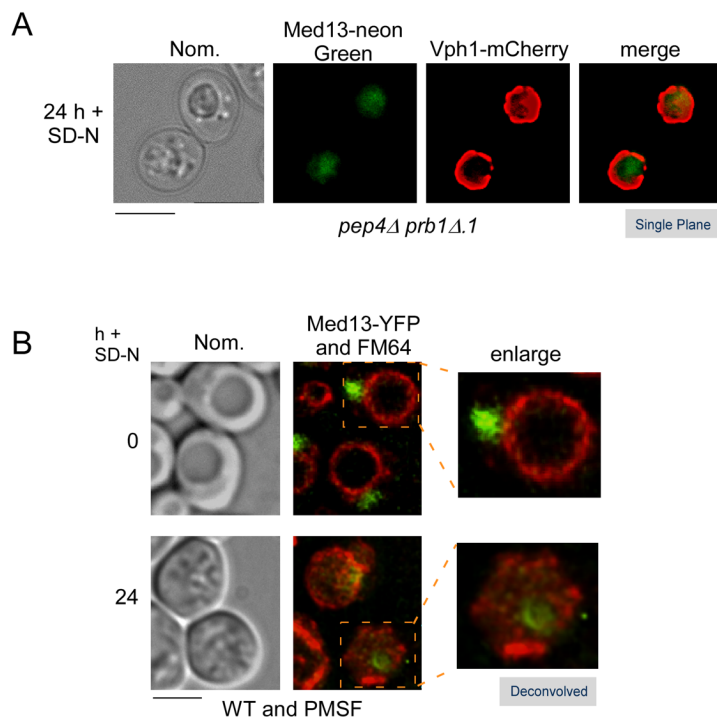

878 **Supplemental Figure 2. Med13 accumulates within the vacuole following nitrogen**  
879 **starvation. A** Fluorescence microscopy of *pep4Δ prb1Δ.1* cells expressing endogenous Med13-  
880 mNeongreen and Vph1-mCherry (vacuole marker) after 24 h in SD-N. Representative single plane  
881 images are shown. Bar = 5 $\mu$ m. **B** Fluorescence microscopy of wild-type cells expressing  
882 endogenous Med13-YFP (RSY1812) treated with 200 mM PMSF before and after 24 h in SD-N  
883 media. FM4-64 staining was used to visualize the vacuole. Representative deconvolved images  
884 are shown. Bar = 5 $\mu$ m.

Supplemental Figure 3

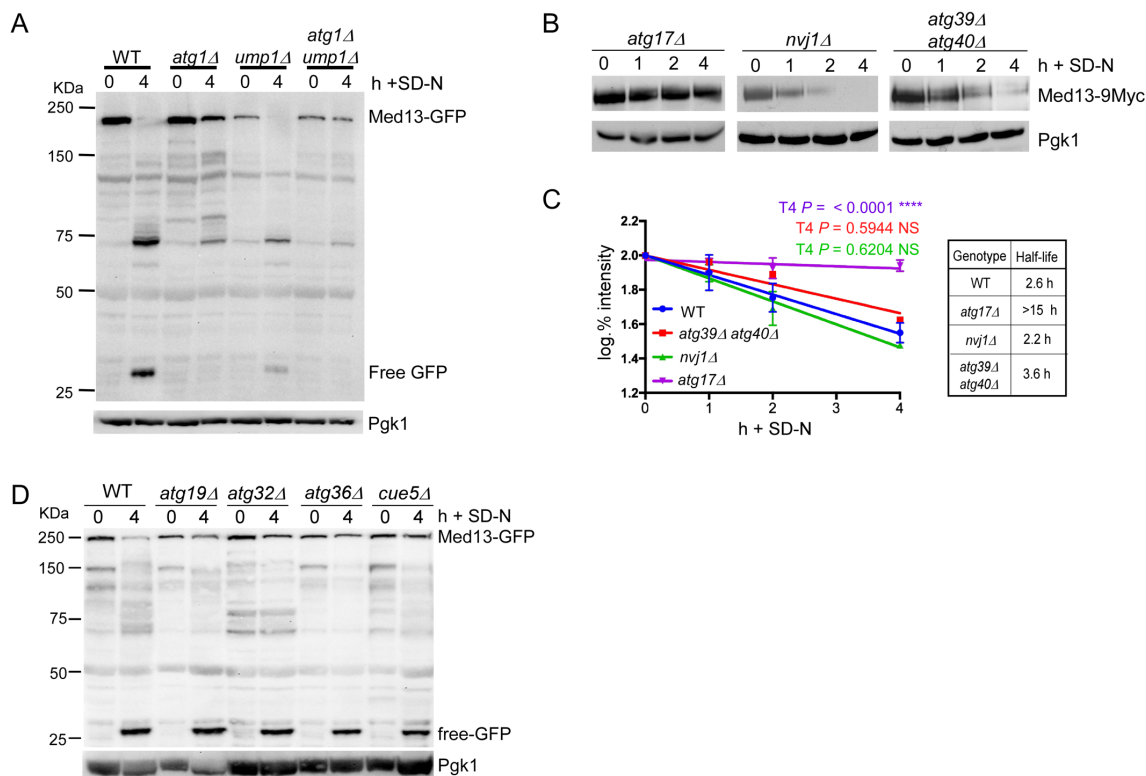

885 **Supplemental Figure 3. The autophagic degradation of Med13 does not require known**  
 886 **selective autophagy adapter proteins. A** Western blot analysis of Med13-GFP cleavage assays  
 887 in WY (RSY10), *atg1Δ* (RSY2094), (RSY2160) and *atg1Δ ump1Δ* (RSY2202) cells after nitrogen  
 888 starvation. **B** Western blot analysis of endogenous Med13-9myc degradation kinetics in *atg17Δ*  
 889 cells as well as in strains defective in known nucleophagy pathways following nitrogen starvation.  
 890 **C** Degradation kinetics and half-life of Med13 protein levels obtained in a. Error bars indicate S.D.,  
 891 N=3 biological samples. **D** Wild-type BY4741 cells and the indicated mutants expressing Med13-  
 892 GFP (pSW218) were nitrogen-starved for the indicated times and the accumulation of free GFP  
 893 was monitored by Western blot analysis using anti-GFP antibodies. Pgk1 levels were used as a  
 894 protein loading control for all experiments. Degradation kinetics of Med13-GFP are slower in  
 895 BY4741 cells which are more resistant to stress than the W303 strain. However, all these mutants  
 896 accumulated free GFP which is indicative of vacuolar degradation.

## Supplemental Figure 4

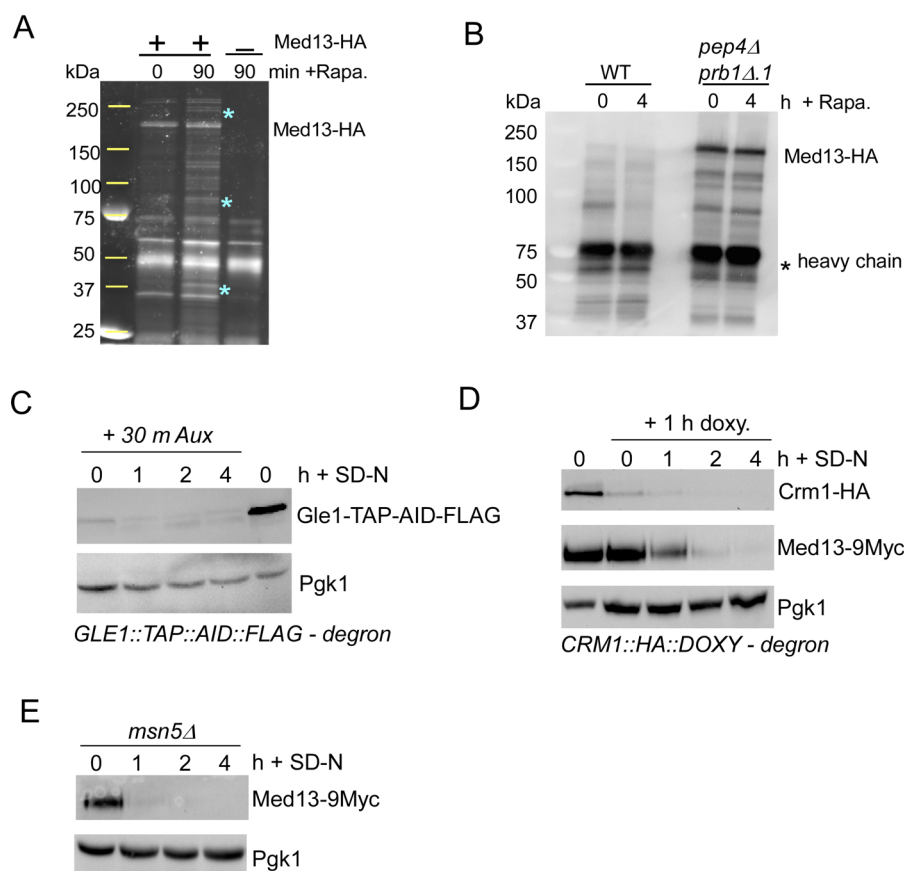

897 **Supplemental Figure 4. Mass spectrometry screen to identify proteins required for Med13**  
 898 **vacuolar degradation.** **A** SDS-PAGE gel of immunoprecipitation assays with Med13 in unstressed  
 899 cells or cells treated with 50nM rapamycin for 90 minutes. Spyro Ruby stain was used to visualize  
 900 proteins immunoprecipitated with Med13-3xHA from whole cell lysate. Asterisks denote bands that  
 901 were present in stressed samples and absent in unstressed samples. **B** Western blot analysis of  
 902 immunoprecipitation experiments performed in wild-type and *pep4Δprb1Δ.1* cells. Cells harboring  
 903 an expression plasmid for Med13-3HA were grown to mid-log and treated with 50nM rapamycin for  
 904 4 h. **C** Gle1 auxin inducible degron-degron system. The BY4741 strain harboring endogenous  
 905 *GLE1-TAP-AID-FLAG* were grown to mid-log and treated with 250  $\mu$ M Auxin. Cells were then  
 906 washed and resuspended in SD-N media containing 250  $\mu$ M Auxin for indicated time points. Gle1  
 907 protein depletion was monitored via Western blot analysis using antibodies against FLAG. **D** Crm1-  
 908 doxycyclin inducible degron system. Cells expressing Crm1-HA under a tetracycline repressible

909 promoter and endogenous Med13-9xmyc (RSY2348) were grown to mid-log. A sample was  
910 removed prior to the addition of doxycycline for Western blot analysis to visualize Crm1-HA (far left  
911 T=0 bands). The remaining culture was treated with doxycycline for 1 hour prior to switching cells  
912 to SD-N media with doxycycline. Western blot analysis was used to monitor Crm1-HA (top panel)  
913 and Med13-9xmyc (bottom panel) degradation following doxycycline and nitrogen starvation  
914 treatment. **E** Western blot analysis of Med13-9xmyc protein levels following nitrogen starvation in  
915 *msn5* $\Delta$  cells (RSY2399).  
916

## Supplemental Figure 5

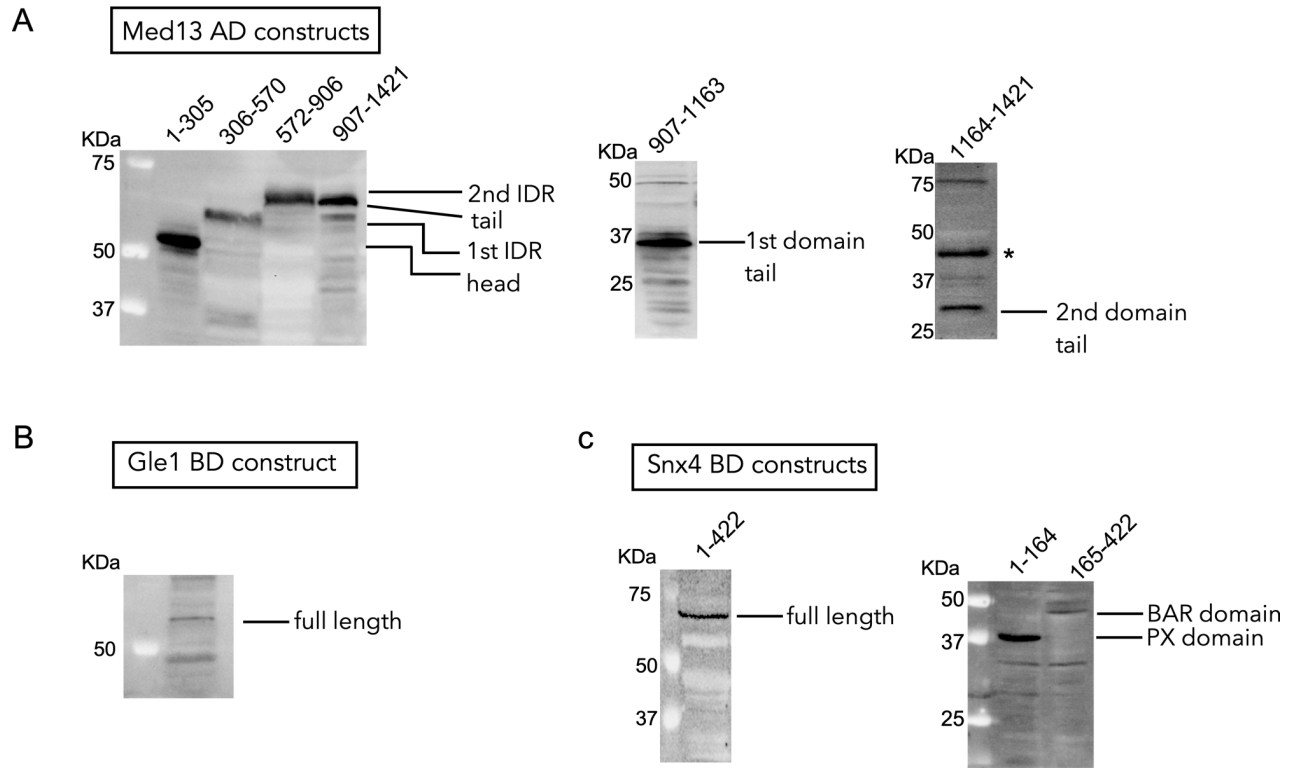

917  
918 **Supplemental Figure 5. Western blot controls for Y2H plasmids. A,** Western blot analysis of  
919 cells expressing indicated Med13 activating domain Y2H constructs. **B and C** Western blot analysis  
920 of cells expressing of Gle1 and Snx4 binding domain Y2H constructs respectively.  
921



Supplemental Figure 6

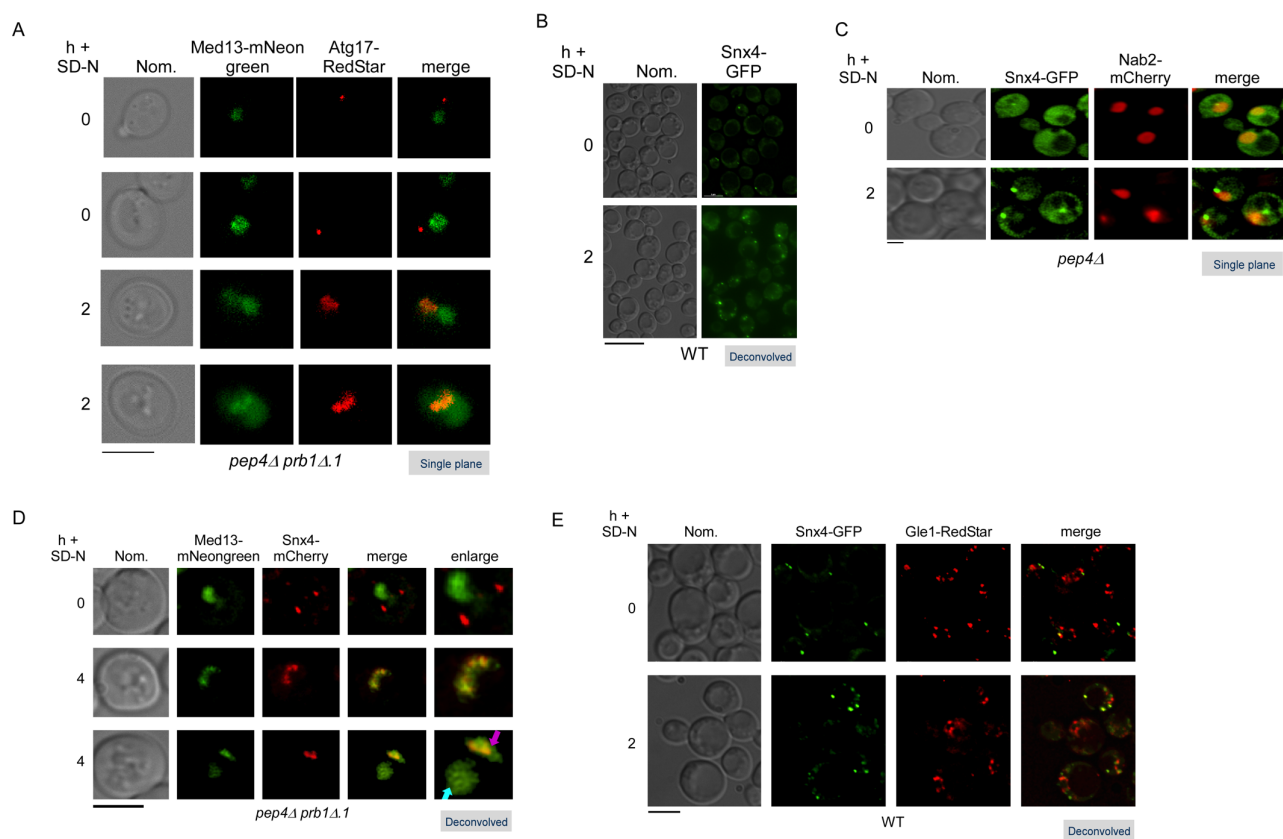

922

923 **Supplemental Figure 6. Snx4 localizes to the nuclear periphery following nitrogen**

924 **starvation. A** Fluorescence microscopy monitoring colocalization of endogenous Med13-

925 mNeon green and Atg17-Redstar after 2 h of nitrogen starvation in *pep4Δ prb1Δ.1* cells (RSY2400).

926 Representative single plane images are shown. Bar = 5μm. **B** Fluorescence microscopy of GFP-

927 Snx4 localization in wild-type cells following 2 h of nitrogen starvation. The number of foci increases

928 following stress. Representative deconvolved images are shown. Bar = 5μm. **C** Fluorescence

929 microscopy of *pep4Δ* cells expressing GFP-Snx4 and harboring Nab2-mCherry (nuclear marker)

930 before and after nitrogen starvation. Representative deconvolved images are shown. Bar = 5μm.)

931 **D** Fluorescence microscopy of endogenous Med13-mNeon green and mCherry-Snx4 in *pep4Δ*

932 *prb1Δ.1* cells before and after nitrogen starvation. Representative deconvolved images are shown.

933 Vacuolar Med13 population indicated by the blue arrow and perinuclear Med13-Snx4 colocalization

934 indicated by the pink arrow. Bar = 5μm. **E** Fluorescence microscopy of colocalization experiments

935 performed in wild-type cells expressing GFP-Snx4 and endogenous Gle1-RedStar. Cells were  
936 grown to mid-log, washed and resuspended in SD-N media for 2 h. Representative large field view  
937 deconvolved images are shown. Bar = 5 $\mu$ m.

## Supplemental Figure 7

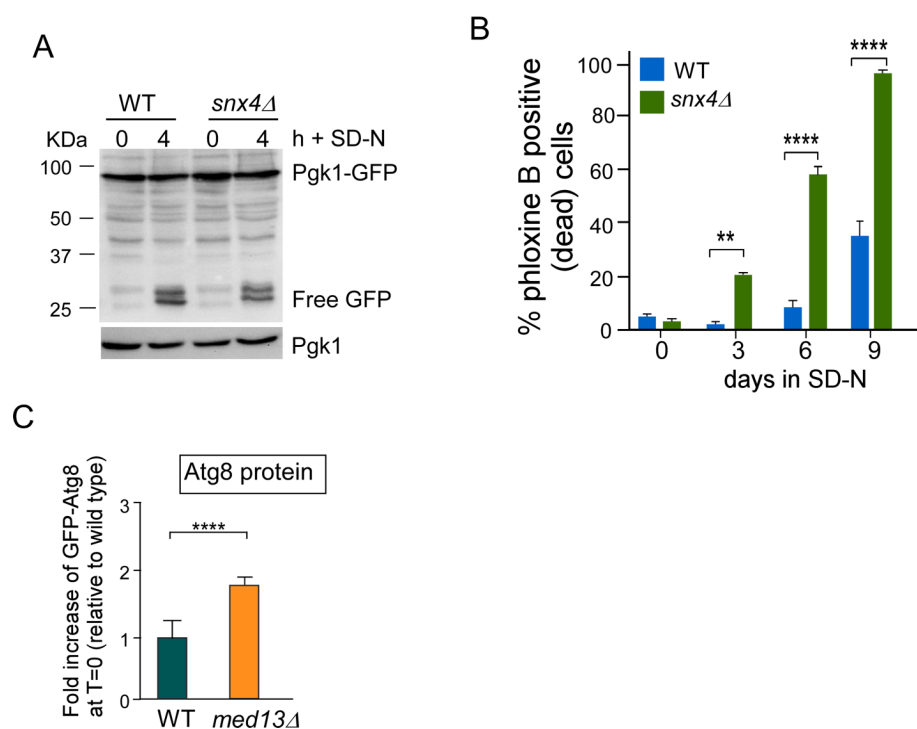

938

939 **Supplemental Figure 7. Snx4 is required for viability in long-term nitrogen starvation.**

940 **A** Western blot analysis of Pgk1- GFP (pSH4) cleavage assays in wild-type and *snx4Δ* cells

941 following nitrogen starvation. Endogenous Pgk1 protein levels were used as a loading control. **B**

942 Wild-type and *snx4Δ* cells were grown to mid-log, washed and resuspended in SD-N media for the

943 indicated number of days. The percentage of inviable cells within the population was determined

944 using phloxine B staining and fluorescence activated cell analysis (FAC). Quantification of N=2

945 independent biological experiments. Data are mean  $\pm$  S.D. \*\*  $P = 0.0012$ , \*\*\*\*  $P = <0.0001$  (Willis

946 *et al.*, 2020) **C** Quantification Atg8 protein levels in wild-type and *med13Δ* cells relative to Pgk1

947 loading control. Quantification of N=3 biological samples. Data are mean  $\pm$  S.D. \*\*\*\*  $P = <0.0001$

948

949

Source Data Figure 1

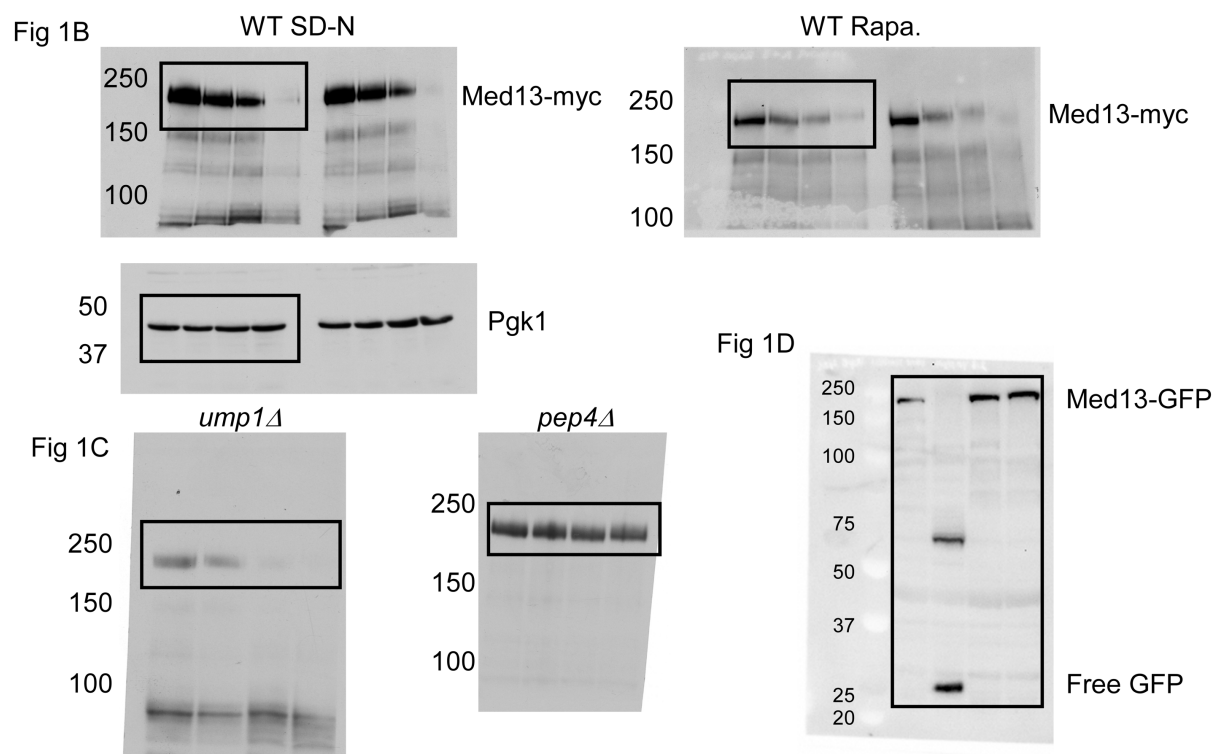

Source Data for figure 1. Black boxes contain cropped representative images depicted in figure 1.

950

951

952

953

954

### Source Data Figure 2

955

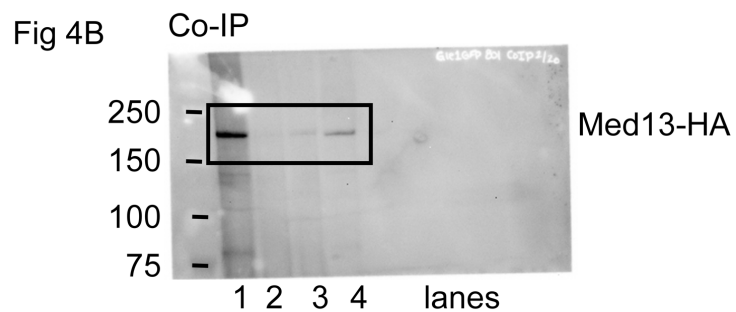

956

957

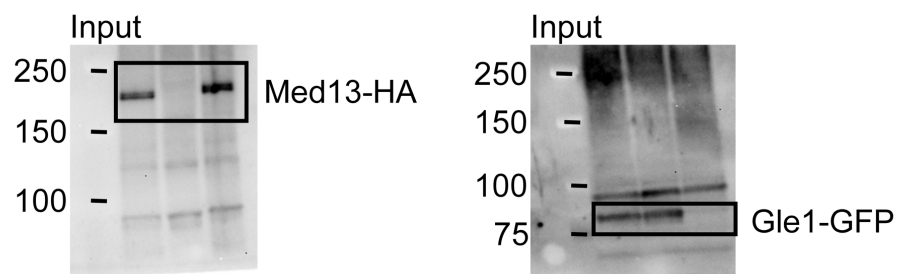

Source data for figure 4B. Black boxes contain representative cropped images depicted in figure 4.
